# Supplementary material
Source: PubMed Central journal article supplement (PMC4398030)
Supplement: NIHMS677767-supplement-01.pdf [file NIHMS677767-supplement-01.pdf]

542 **APPENDIX S1**

543 Data Selection - The Red List is the most widely accepted database available for assessing  
544 species' global risk of extinction and has been used in myriad studies aimed at quantifying the  
545 role of disease and other threats in the global loss of biological diversity (e.g., Gurevitch &  
546 Padilla 2004; Clavero & Garcia-Berthou 2005; Smith et al. 2006; Rodrigues et al. 2006). We  
547 chose to study amphibians, birds, and mammals as they are the most represented classes in the  
548 Red List and arguably the best-studied overall (Baillie et al. 2004). We included species that are  
549 extinct in the wild under the category of 'extinct' because there are too few of these species to  
550 reliably assess them on their own. We used the Red List advanced search tool to compile a list of  
551 all near threatened and threatened mammal, bird and amphibian species for assessment years  
552 1996-2011. This search yielded a list of 19,378 species. For each of these we read each account  
553 in full to identify those for which disease was a threat (following the methods of Smith et al.  
554 2006). When the Full Account was read, the suite of terms and concepts that could describe  
555 disease threats to a given species was cast broadly to include the following: pathogen, parasite,  
556 disease, virus, bacteria, malaria, pox, infection, helminth, protozoa, protista, endoparasite,  
557 ectoparasite and fungus/fungi.

558

559 Extinct and Extinct in the Wild Species - It is important to note further differences between the  
560 extinct and extinct in the wild statuses and other status categories in the data. The extinct  
561 categories are unique in that they not reflect a specific stage in the pathway towards extinction but  
562 rather a temporal endpoint. Therefore, the threats listed in the Red List for extinct species  
563 constitute all threats that ever affected the species without distinguishing when they played a  
564 role. For the other status categories, however, threats can change between assessments either by

565 being added or deleted, which make these threats more status-specific (IUCN 2011). Moreover,  
566 Red List assessment updates provide a way to observe changes in status categories between  
567 assessments, which can indicate changes in threats over time (Butchart 2005). This is not  
568 possible for extinct species. This difference in the extinct categories affects our ability to  
569 determine the time sequence of threats in extinct species. That being said, we included the  
570 extinct category in our graphical depictions because it does provide us with important  
571 information about disease in species' paths toward towards extinction. It is critical to note that  
572 the removal of extinct categories from the CTA analyses do not change the significant trends we  
573 see for amphibians, birds, mammals, or all species.

574

575 Threat Categories - We created six general threat categories (Fig. 2, Fig. 3) for ease of  
576 preliminary investigation: land-use change, overexploitation, problematic /invasive species,  
577 pollution, geological events, climate change/severe weather, and disease. Red List threat  
578 categories 1-4, 6-7 and 5.2/5.3 were lumped under land-use change (the latter because we did not  
579 assess plants in this study but these threats, gathering plants and logging, may impact animal  
580 species). Problematic/invasive species, pollution, geological events, climate change/severe  
581 weather paralleled IUCN categories. However, disease is listed as a threat under the  
582 problematic/invasive species category so we examined each threat listed under this category and  
583 removed the species that were only affected by disease and not another problematic/invasive  
584 species. Threats 5.1 and 5.4 refer to animal exploitation either as intentional or accidental and  
585 were grouped together as overexploitation.

586

587

588 **Supporting Information Literature Cited**

- 589 Butchart, S. H. M., A. J. Stattersfield, J. Baillie, L.A. Bennun, S.N. Stuart, H.R. Akçakaya, C.  
590 Hilton-Taylor, and G.M. Mace. 2005. Using Red List Indices to measure progress towards the  
591 2010 target and beyond. *Philosophical Transactions of Royal Society London: B Biological*  
592 *Sciences* **360**:255-268.  
593
- 594 Clavero, M., and E. Garcia-Berthou. 2005. Invasive species are a leading cause of animal  
595 extinctions. *Trends in Ecology & Evolution* **20**:110.  
596
- 597 Gurevitch, J., and D. K. Padilla. 2004. Are invasive species a major cause of extinctions? *Trends*  
598 *in Ecology and Evolution* **19**:470-474.  
599
- 600 IUCN 2011. IUCN Red List of Threatened Species. Version 2011.2.  
601 <<http://www.iucnredlist.org>>. Downloaded on 2 February 2012.  
602
- 603 Rodrigues, A. S. L., J. D. Pilgrim, J. F. Lamoreux, M. Hoffman, and T. M. Brooks. 2006. The  
604 value of the IUCN Red List for conservation. *Trends in Ecology & Evolution* **21**:71-76.  
605
- 606 Smith, K. F., D. F. Sax, and K. D. Lafferty. 2006. Evidence for the role of infectious disease in  
607 species extinction and endangerment. *Conservation Biology* **20**:1349-1357.

608 **TABLE S1:** Species threatened with disease in the IUCN Red List.

609 **TABLE S1**

| <b>Class</b> | <b>Genus</b>      | <b>Species</b>      | <b>IUCN Status</b> | <b>Evidence</b>     | <b>Disease</b>      |
|--------------|-------------------|---------------------|--------------------|---------------------|---------------------|
| AMPHIBIA     | <i>Adelotus</i>   | <i>brevis</i>       | NT                 | Evidence            | Chytridiomycosis    |
| AMPHIBIA     | <i>Agalychnis</i> | <i>annae</i>        | EN                 | Hypothesized/Future | Chytridiomycosis    |
| AMPHIBIA     | <i>Agalychnis</i> | <i>moreletii</i>    | CR                 | Hypothesized/Future | Chytridiomycosis    |
| AMPHIBIA     | <i>Agalychnis</i> | <i>spurrelli</i>    | LC                 | Hypothesized/Future | Chytridiomycosis    |
| AMPHIBIA     | <i>Allobates</i>  | <i>olfersioides</i> | VU                 | Evidence            | Chytridiomycosis    |
| AMPHIBIA     | <i>Alytes</i>     | <i>cisternasii</i>  | NT                 | Hypothesized/Future | Chytridiomycosis    |
| AMPHIBIA     | <i>Alytes</i>     | <i>dickhilleni</i>  | VU                 | Hypothesized/Future | Chytridiomycosis    |
| AMPHIBIA     | <i>Alytes</i>     | <i>muletensis</i>   | VU                 | Evidence            | Multiple Diseases   |
| AMPHIBIA     | <i>Alytes</i>     | <i>obstetricans</i> | LC                 | Evidence            | Multiple Diseases   |
| AMPHIBIA     | <i>Ambystoma</i>  | <i>mexicanum</i>    | CR                 | Evidence            | Multiple Diseases   |
| AMPHIBIA     | <i>Ambystoma</i>  | <i>tigrinum</i>     | LC                 | Evidence            | Bacterial Pathogens |
| AMPHIBIA     | <i>Amietia</i>    | <i>dracomontana</i> | LC                 | Hypothesized/Future | Chytridiomycosis    |
| AMPHIBIA     | <i>Amietia</i>    | <i>fuscigula</i>    | LC                 | Hypothesized/Future | Chytridiomycosis    |
| AMPHIBIA     | <i>Amietia</i>    | <i>vertebralis</i>  | NT                 | Evidence            | Chytridiomycosis    |
| AMPHIBIA     | <i>Anaxyrus</i>   | <i>baxteri</i>      | EW                 | Evidence            | Chytridiomycosis    |
| AMPHIBIA     | <i>Anaxyrus</i>   | <i>boreas</i>       | NT                 | Evidence            | Multiple Diseases   |
| AMPHIBIA     | <i>Anaxyrus</i>   | <i>canorus</i>      | EN                 | Evidence            | Chytridiomycosis    |
| AMPHIBIA     | <i>Aneides</i>    | <i>aeneus</i>       | NT                 | Hypothesized/Future | Unnamed Disease     |

|          |                      |                       |    |                     |                  |
|----------|----------------------|-----------------------|----|---------------------|------------------|
| AMPHIBIA | <i>Aplastodiscus</i> | <i>callipygius</i>    | LC | Hypothesized/Future | Chytridiomycosis |
| AMPHIBIA | <i>Aplastodiscus</i> | <i>leucopygius</i>    | LC | Hypothesized/Future | Chytridiomycosis |
| AMPHIBIA | <i>Aromobates</i>    | <i>alboguttatus</i>   | EN | Hypothesized/Future | Chytridiomycosis |
| AMPHIBIA | <i>Aromobates</i>    | <i>leopardalis</i>    | CR | Hypothesized/Future | Chytridiomycosis |
| AMPHIBIA | <i>Aromobates</i>    | <i>nocturnus</i>      | CR | Hypothesized/Future | Chytridiomycosis |
| AMPHIBIA | <i>Atelognathus</i>  | <i>patagonicus</i>    | EN | Evidence            | Unnamed Disease  |
| AMPHIBIA | <i>Atelopus</i>      | <i>andinus</i>        | CR | Hypothesized/Future | Chytridiomycosis |
| AMPHIBIA | <i>Atelopus</i>      | <i>angelito</i>       | CR | Hypothesized/Future | Chytridiomycosis |
| AMPHIBIA | <i>Atelopus</i>      | <i>arsyecue</i>       | CR | Hypothesized/Future | Chytridiomycosis |
| AMPHIBIA | <i>Atelopus</i>      | <i>arthuri</i>        | CR | Hypothesized/Future | Chytridiomycosis |
| AMPHIBIA | <i>Atelopus</i>      | <i>balios</i>         | CR | Hypothesized/Future | Chytridiomycosis |
| AMPHIBIA | <i>Atelopus</i>      | <i>bomolochos</i>     | CR | Evidence            | Chytridiomycosis |
| AMPHIBIA | <i>Atelopus</i>      | <i>boulengeri</i>     | CR | Hypothesized/Future | Chytridiomycosis |
| AMPHIBIA | <i>Atelopus</i>      | <i>carauta</i>        | CR | Hypothesized/Future | Chytridiomycosis |
| AMPHIBIA | <i>Atelopus</i>      | <i>carbonerensis</i>  | CR | Evidence            | Chytridiomycosis |
| AMPHIBIA | <i>Atelopus</i>      | <i>carrikeri</i>      | CR | Hypothesized/Future | Chytridiomycosis |
| AMPHIBIA | <i>Atelopus</i>      | <i>certus</i>         | EN | Hypothesized/Future | Chytridiomycosis |
| AMPHIBIA | <i>Atelopus</i>      | <i>chiriquiensis</i>  | CR | Evidence            | Chytridiomycosis |
| AMPHIBIA | <i>Atelopus</i>      | <i>chocoensis</i>     | CR | Hypothesized/Future | Chytridiomycosis |
| AMPHIBIA | <i>Atelopus</i>      | <i>chrysocorallus</i> | CR | Hypothesized/Future | Chytridiomycosis |
| AMPHIBIA | <i>Atelopus</i>      | <i>coynei</i>         | CR | Hypothesized/Future | Chytridiomycosis |

|          |                 |                      |    |                     |                  |
|----------|-----------------|----------------------|----|---------------------|------------------|
| AMPHIBIA | <i>Atelopus</i> | <i>cruciger</i>      | CR | Evidence            | Chytridiomycosis |
| AMPHIBIA | <i>Atelopus</i> | <i>dimorphus</i>     | EN | Hypothesized/Future | Chytridiomycosis |
| AMPHIBIA | <i>Atelopus</i> | <i>ebenoides</i>     | CR | Hypothesized/Future | Chytridiomycosis |
| AMPHIBIA | <i>Atelopus</i> | <i>elegans</i>       | CR | Hypothesized/Future | Chytridiomycosis |
| AMPHIBIA | <i>Atelopus</i> | <i>epikeisthos</i>   | CR | Hypothesized/Future | Chytridiomycosis |
| AMPHIBIA | <i>Atelopus</i> | <i>erythropus</i>    | CR | Hypothesized/Future | Chytridiomycosis |
| AMPHIBIA | <i>Atelopus</i> | <i>eusebianus</i>    | CR | Hypothesized/Future | Chytridiomycosis |
| AMPHIBIA | <i>Atelopus</i> | <i>exiguus</i>       | CR | Hypothesized/Future | Chytridiomycosis |
| AMPHIBIA | <i>Atelopus</i> | <i>famelicus</i>     | CR | Hypothesized/Future | Chytridiomycosis |
| AMPHIBIA | <i>Atelopus</i> | <i>farci</i>         | CR | Hypothesized/Future | Chytridiomycosis |
| AMPHIBIA | <i>Atelopus</i> | <i>flavescens</i>    | VU | Hypothesized/Future | Chytridiomycosis |
| AMPHIBIA | <i>Atelopus</i> | <i>franciscus</i>    | VU | Hypothesized/Future | Chytridiomycosis |
| AMPHIBIA | <i>Atelopus</i> | <i>galactogaster</i> | CR | Hypothesized/Future | Chytridiomycosis |
| AMPHIBIA | <i>Atelopus</i> | <i>glyphus</i>       | CR | Hypothesized/Future | Chytridiomycosis |
| AMPHIBIA | <i>Atelopus</i> | <i>guanujo</i>       | CR | Hypothesized/Future | Chytridiomycosis |
| AMPHIBIA | <i>Atelopus</i> | <i>guitarraensis</i> | CR | Hypothesized/Future | Chytridiomycosis |
| AMPHIBIA | <i>Atelopus</i> | <i>halihelos</i>     | CR | Hypothesized/Future | Chytridiomycosis |
| AMPHIBIA | <i>Atelopus</i> | <i>ignescens</i>     | EX | Hypothesized/Future | Chytridiomycosis |
| AMPHIBIA | <i>Atelopus</i> | <i>laetissimus</i>   | CR | Hypothesized/Future | Chytridiomycosis |
| AMPHIBIA | <i>Atelopus</i> | <i>limosus</i>       | EN | Hypothesized/Future | Chytridiomycosis |
| AMPHIBIA | <i>Atelopus</i> | <i>longibrachius</i> | EN | Hypothesized/Future | Chytridiomycosis |

|          |                 |                        |    |                     |                  |
|----------|-----------------|------------------------|----|---------------------|------------------|
| AMPHIBIA | <i>Atelopus</i> | <i>longirostris</i>    | EX | Hypothesized/Future | Chytridiomycosis |
| AMPHIBIA | <i>Atelopus</i> | <i>lozanoi</i>         | CR | Hypothesized/Future | Chytridiomycosis |
| AMPHIBIA | <i>Atelopus</i> | <i>lynchi</i>          | CR | Hypothesized/Future | Chytridiomycosis |
| AMPHIBIA | <i>Atelopus</i> | <i>mandingues</i>      | CR | Hypothesized/Future | Chytridiomycosis |
| AMPHIBIA | <i>Atelopus</i> | <i>mindoensis</i>      | CR | Hypothesized/Future | Chytridiomycosis |
| AMPHIBIA | <i>Atelopus</i> | <i>minutulus</i>       | CR | Hypothesized/Future | Chytridiomycosis |
| AMPHIBIA | <i>Atelopus</i> | <i>mittermeieri</i>    | EN | Evidence            | Chytridiomycosis |
| AMPHIBIA | <i>Atelopus</i> | <i>monohernandezii</i> | CR | Hypothesized/Future | Chytridiomycosis |
| AMPHIBIA | <i>Atelopus</i> | <i>mucubajiensis</i>   | CR | Evidence            | Chytridiomycosis |
| AMPHIBIA | <i>Atelopus</i> | <i>muisca</i>          | CR | Hypothesized/Future | Chytridiomycosis |
| AMPHIBIA | <i>Atelopus</i> | <i>nahumae</i>         | CR | Hypothesized/Future | Chytridiomycosis |
| AMPHIBIA | <i>Atelopus</i> | <i>nanay</i>           | CR | Hypothesized/Future | Chytridiomycosis |
| AMPHIBIA | <i>Atelopus</i> | <i>nepiozomus</i>      | CR | Hypothesized/Future | Chytridiomycosis |
| AMPHIBIA | <i>Atelopus</i> | <i>nicefori</i>        | CR | Hypothesized/Future | Chytridiomycosis |
| AMPHIBIA | <i>Atelopus</i> | <i>onorei</i>          | CR | Hypothesized/Future | Chytridiomycosis |
| AMPHIBIA | <i>Atelopus</i> | <i>oxapampae</i>       | EN | Hypothesized/Future | Chytridiomycosis |
| AMPHIBIA | <i>Atelopus</i> | <i>oxyrhynchus</i>     | CR | Hypothesized/Future | Chytridiomycosis |
| AMPHIBIA | <i>Atelopus</i> | <i>pachydermus</i>     | CR | Hypothesized/Future | Chytridiomycosis |
| AMPHIBIA | <i>Atelopus</i> | <i>pedimarmoratus</i>  | CR | Hypothesized/Future | Chytridiomycosis |
| AMPHIBIA | <i>Atelopus</i> | <i>peruensis</i>       | CR | Hypothesized/Future | Chytridiomycosis |
| AMPHIBIA | <i>Atelopus</i> | <i>petersi</i>         | CR | Hypothesized/Future | Chytridiomycosis |



|          |                 |                     |    |                     |                  |
|----------|-----------------|---------------------|----|---------------------|------------------|
| AMPHIBIA | <i>Atelopus</i> | <i>petriruizi</i>   | CR | Hypothesized/Future | Chytridiomycosis |
| AMPHIBIA | <i>Atelopus</i> | <i>pictiventris</i> | CR | Hypothesized/Future | Chytridiomycosis |
| AMPHIBIA | <i>Atelopus</i> | <i>pinangoi</i>     | CR | Hypothesized/Future | Chytridiomycosis |
| AMPHIBIA | <i>Atelopus</i> | <i>planispina</i>   | CR | Hypothesized/Future | Chytridiomycosis |
| AMPHIBIA | <i>Atelopus</i> | <i>pulcher</i>      | CR | Evidence            | Chytridiomycosis |
| AMPHIBIA | <i>Atelopus</i> | <i>pyrodactylus</i> | CR | Hypothesized/Future | Chytridiomycosis |
| AMPHIBIA | <i>Atelopus</i> | <i>quimbaya</i>     | CR | Hypothesized/Future | Chytridiomycosis |
| AMPHIBIA | <i>Atelopus</i> | <i>reticulatus</i>  | CR | Hypothesized/Future | Chytridiomycosis |
| AMPHIBIA | <i>Atelopus</i> | <i>seminiferus</i>  | CR | Hypothesized/Future | Chytridiomycosis |
| AMPHIBIA | <i>Atelopus</i> | <i>senex</i>        | CR | Hypothesized/Future | Chytridiomycosis |
| AMPHIBIA | <i>Atelopus</i> | <i>sernai</i>       | CR | Hypothesized/Future | Chytridiomycosis |
| AMPHIBIA | <i>Atelopus</i> | <i>simulatus</i>    | CR | Hypothesized/Future | Chytridiomycosis |
| AMPHIBIA | <i>Atelopus</i> | <i>sonsonensis</i>  | CR | Hypothesized/Future | Chytridiomycosis |
| AMPHIBIA | <i>Atelopus</i> | <i>sorianoi</i>     | CR | Evidence            | Chytridiomycosis |
| AMPHIBIA | <i>Atelopus</i> | <i>spumarius</i>    | VU | Hypothesized/Future | Chytridiomycosis |
| AMPHIBIA | <i>Atelopus</i> | <i>spurrelli</i>    | VU | Hypothesized/Future | Chytridiomycosis |
| AMPHIBIA | <i>Atelopus</i> | <i>subornatus</i>   | CR | Hypothesized/Future | Chytridiomycosis |
| AMPHIBIA | <i>Atelopus</i> | <i>tamaensis</i>    | CR | Hypothesized/Future | Chytridiomycosis |
| AMPHIBIA | <i>Atelopus</i> | <i>tricolor</i>     | VU | Hypothesized/Future | Chytridiomycosis |
| AMPHIBIA | <i>Atelopus</i> | <i>varius</i>       | CR | Evidence            | Chytridiomycosis |
| AMPHIBIA | <i>Atelopus</i> | <i>walkeri</i>      | CR | Hypothesized/Future | Chytridiomycosis |

|          |                       |                     |    |                     |                  |
|----------|-----------------------|---------------------|----|---------------------|------------------|
| AMPHIBIA | <i>Atelopus</i>       | <i>zeteki</i>       | CR | Hypothesized/Future | Chytridiomycosis |
| AMPHIBIA | <i>Batrachuperus</i>  | <i>pinchonii</i>    | VU | Evidence            | Unnamed Disease  |
| AMPHIBIA | <i>Bokermannohyla</i> | <i>circumdata</i>   | LC | Hypothesized/Future | Chytridiomycosis |
| AMPHIBIA | <i>Bokermannohyla</i> | <i>hylax</i>        | LC | Hypothesized/Future | Chytridiomycosis |
| AMPHIBIA | <i>Bolitoglossa</i>   | <i>conanti</i>      | EN | Evidence            | Chytridiomycosis |
| AMPHIBIA | <i>Bolitoglossa</i>   | <i>diaphora</i>     | CR | Evidence            | Chytridiomycosis |
| AMPHIBIA | <i>Bolitoglossa</i>   | <i>dofleini</i>     | NT | Hypothesized/Future | Chytridiomycosis |
| AMPHIBIA | <i>Bolitoglossa</i>   | <i>magnifica</i>    | EN | Hypothesized/Future | Chytridiomycosis |
| AMPHIBIA | <i>Bolitoglossa</i>   | <i>occidentalis</i> | LC | Hypothesized/Future | Chytridiomycosis |
| AMPHIBIA | <i>Bolitoglossa</i>   | <i>pesrubra</i>     | VU | Hypothesized/Future | Chytridiomycosis |
| AMPHIBIA | <i>Bolitoglossa</i>   | <i>sombra</i>       | VU | Hypothesized/Future | Chytridiomycosis |
| AMPHIBIA | <i>Bolitoglossa</i>   | <i>sooyorum</i>     | EN | Hypothesized/Future | Chytridiomycosis |
| AMPHIBIA | <i>Bolitoglossa</i>   | <i>subpalmata</i>   | EN | Hypothesized/Future | Chytridiomycosis |
| AMPHIBIA | <i>Bromeliodhyla</i>  | <i>bromeliacia</i>  | EN | Hypothesized/Future | Chytridiomycosis |
| AMPHIBIA | <i>Bromeliodhyla</i>  | <i>dendroscarta</i> | CR | Hypothesized/Future | Chytridiomycosis |
| AMPHIBIA | <i>Bufo</i>           | <i>bufo</i>         | LC | Hypothesized/Future | Chytridiomycosis |
| AMPHIBIA | <i>Centrolene</i>     | <i>audax</i>        | EN | Hypothesized/Future | Chytridiomycosis |
| AMPHIBIA | <i>Centrolene</i>     | <i>azulae</i>       | EN | Hypothesized/Future | Chytridiomycosis |
| AMPHIBIA | <i>Centrolene</i>     | <i>ballux</i>       | CR | Hypothesized/Future | Chytridiomycosis |
| AMPHIBIA | <i>Centrolene</i>     | <i>buckleyi</i>     | VU | Hypothesized/Future | Chytridiomycosis |
| AMPHIBIA | <i>Centrolene</i>     | <i>geckoideum</i>   | VU | Hypothesized/Future | Chytridiomycosis |

|          |                         |                      |    |                     |                  |
|----------|-------------------------|----------------------|----|---------------------|------------------|
| AMPHIBIA | <i>Centrolene</i>       | <i>gemmatum</i>      | CR | Hypothesized/Future | Chytridiomycosis |
| AMPHIBIA | <i>Centrolene</i>       | <i>heloderma</i>     | CR | Hypothesized/Future | Chytridiomycosis |
| AMPHIBIA | <i>Centrolene</i>       | <i>hesperium</i>     | VU | Hypothesized/Future | Chytridiomycosis |
| AMPHIBIA | <i>Centrolene</i>       | <i>lynchi</i>        | EN | Hypothesized/Future | Chytridiomycosis |
| AMPHIBIA | <i>Centrolene</i>       | <i>peristictum</i>   | VU | Hypothesized/Future | Chytridiomycosis |
| AMPHIBIA | <i>Centrolene</i>       | <i>pipilatum</i>     | EN | Hypothesized/Future | Chytridiomycosis |
| AMPHIBIA | <i>Centrolene</i>       | <i>prosolepon</i>    | LC | Hypothesized/Future | Chytridiomycosis |
| AMPHIBIA | <i>Charadrahyla</i>     | <i>altipotens</i>    | CR | Hypothesized/Future | Chytridiomycosis |
| AMPHIBIA | <i>Charadrahyla</i>     | <i>nephila</i>       | VU | Hypothesized/Future | Chytridiomycosis |
| AMPHIBIA | <i>Charadrahyla</i>     | <i>trux</i>          | CR | Hypothesized/Future | Chytridiomycosis |
| AMPHIBIA | <i>Chiropterotriton</i> | <i>cracens</i>       | EN | Hypothesized/Future | Chytridiomycosis |
| AMPHIBIA | <i>Chiropterotriton</i> | <i>multidentatus</i> | EN | Hypothesized/Future | Chytridiomycosis |
| AMPHIBIA | <i>Cochranella</i>      | <i>punctulata</i>    | VU | Evidence            | Unnamed Parasite |
| AMPHIBIA | <i>Cochranella</i>      | <i>saxiscandens</i>  | EN | Hypothesized/Future | Chytridiomycosis |
| AMPHIBIA | <i>Craugastor</i>       | <i>anciano</i>       | CR | Hypothesized/Future | Chytridiomycosis |
| AMPHIBIA | <i>Craugastor</i>       | <i>andi</i>          | CR | Hypothesized/Future | Chytridiomycosis |
| AMPHIBIA | <i>Craugastor</i>       | <i>angelicus</i>     | CR | Hypothesized/Future | Chytridiomycosis |
| AMPHIBIA | <i>Craugastor</i>       | <i>aurilegulus</i>   | EN | Evidence            | Chytridiomycosis |
| AMPHIBIA | <i>Craugastor</i>       | <i>azueroensis</i>   | EN | Hypothesized/Future | Chytridiomycosis |
| AMPHIBIA | <i>Craugastor</i>       | <i>berkenbuschii</i> | NT | Hypothesized/Future | Chytridiomycosis |
| AMPHIBIA | <i>Craugastor</i>       | <i>brocchi</i>       | VU | Hypothesized/Future | Chytridiomycosis |

|          |                   |                      |    |                     |                  |
|----------|-------------------|----------------------|----|---------------------|------------------|
| AMPHIBIA | <i>Craugastor</i> | <i>catalinae</i>     | CR | Hypothesized/Future | Chytridiomycosis |
| AMPHIBIA | <i>Craugastor</i> | <i>charadra</i>      | EN | Hypothesized/Future | Chytridiomycosis |
| AMPHIBIA | <i>Craugastor</i> | <i>chrysozetetes</i> | EX | Hypothesized/Future | Chytridiomycosis |
| AMPHIBIA | <i>Craugastor</i> | <i>cruzi</i>         | CR | Hypothesized/Future | Chytridiomycosis |
| AMPHIBIA | <i>Craugastor</i> | <i>daryi</i>         | EN | Hypothesized/Future | Chytridiomycosis |
| AMPHIBIA | <i>Craugastor</i> | <i>emcelae</i>       | CR | Hypothesized/Future | Chytridiomycosis |
| AMPHIBIA | <i>Craugastor</i> | <i>emleni</i>        | CR | Hypothesized/Future | Chytridiomycosis |
| AMPHIBIA | <i>Craugastor</i> | <i>epochthidius</i>  | CR | Hypothesized/Future | Chytridiomycosis |
| AMPHIBIA | <i>Craugastor</i> | <i>escoces</i>       | EX | Hypothesized/Future | Chytridiomycosis |
| AMPHIBIA | <i>Craugastor</i> | <i>fecundus</i>      | CR | Hypothesized/Future | Chytridiomycosis |
| AMPHIBIA | <i>Craugastor</i> | <i>fitzingeri</i>    | LC | Hypothesized/Future | Chytridiomycosis |
| AMPHIBIA | <i>Craugastor</i> | <i>fleischmanni</i>  | CR | Hypothesized/Future | Chytridiomycosis |
| AMPHIBIA | <i>Craugastor</i> | <i>greggi</i>        | CR | Hypothesized/Future | Chytridiomycosis |
| AMPHIBIA | <i>Craugastor</i> | <i>guerreroensis</i> | CR | Hypothesized/Future | Chytridiomycosis |
| AMPHIBIA | <i>Craugastor</i> | <i>inachus</i>       | EN | Hypothesized/Future | Chytridiomycosis |
| AMPHIBIA | <i>Craugastor</i> | <i>laevissimus</i>   | EN | Hypothesized/Future | Chytridiomycosis |
| AMPHIBIA | <i>Craugastor</i> | <i>laticeps</i>      | NT | Hypothesized/Future | Chytridiomycosis |
| AMPHIBIA | <i>Craugastor</i> | <i>lineatus</i>      | CR | Hypothesized/Future | Chytridiomycosis |
| AMPHIBIA | <i>Craugastor</i> | <i>melanostictus</i> | LC | Hypothesized/Future | Chytridiomycosis |
| AMPHIBIA | <i>Craugastor</i> | <i>merendonensis</i> | CR | Hypothesized/Future | Chytridiomycosis |
| AMPHIBIA | <i>Craugastor</i> | <i>mexicanus</i>     | LC | Hypothesized/Future | Chytridiomycosis |

|          |                   |                         |    |                     |                  |
|----------|-------------------|-------------------------|----|---------------------|------------------|
| AMPHIBIA | <i>Craugastor</i> | <i>milesi</i>           | CR | Hypothesized/Future | Chytridiomycosis |
| AMPHIBIA | <i>Craugastor</i> | <i>obesus</i>           | EN | Hypothesized/Future | Chytridiomycosis |
| AMPHIBIA | <i>Craugastor</i> | <i>olanchano</i>        | CR | Hypothesized/Future | Chytridiomycosis |
| AMPHIBIA | <i>Craugastor</i> | <i>omoaensis</i>        | CR | Hypothesized/Future | Chytridiomycosis |
| AMPHIBIA | <i>Craugastor</i> | <i>pechorum</i>         | EN | Hypothesized/Future | Chytridiomycosis |
| AMPHIBIA | <i>Craugastor</i> | <i>podiciferus</i>      | NT | Hypothesized/Future | Chytridiomycosis |
| AMPHIBIA | <i>Craugastor</i> | <i>polymniae</i>        | CR | Hypothesized/Future | Chytridiomycosis |
| AMPHIBIA | <i>Craugastor</i> | <i>punctariolus</i>     | EN | Hypothesized/Future | Chytridiomycosis |
| AMPHIBIA | <i>Craugastor</i> | <i>ranoides</i>         | CR | Hypothesized/Future | Chytridiomycosis |
| AMPHIBIA | <i>Craugastor</i> | <i>rugulosus</i>        | LC | Hypothesized/Future | Chytridiomycosis |
| AMPHIBIA | <i>Craugastor</i> | <i>rupinius</i>         | LC | Hypothesized/Future | Chytridiomycosis |
| AMPHIBIA | <i>Craugastor</i> | <i>sabrinus</i>         | EN | Hypothesized/Future | Chytridiomycosis |
| AMPHIBIA | <i>Craugastor</i> | <i>saltuarius</i>       | CR | Hypothesized/Future | Chytridiomycosis |
| AMPHIBIA | <i>Craugastor</i> | <i>sandersoni</i>       | EN | Hypothesized/Future | Chytridiomycosis |
| AMPHIBIA | <i>Craugastor</i> | <i>stadelmani</i>       | CR | Hypothesized/Future | Chytridiomycosis |
| AMPHIBIA | <i>Craugastor</i> | <i>tabasarae</i>        | CR | Evidence            | Chytridiomycosis |
| AMPHIBIA | <i>Craugastor</i> | <i>talamancae</i>       | LC | Hypothesized/Future | Chytridiomycosis |
| AMPHIBIA | <i>Craugastor</i> | <i>taurus</i>           | CR | Hypothesized/Future | Chytridiomycosis |
| AMPHIBIA | <i>Craugastor</i> | <i>trachydermus</i>     | CR | Hypothesized/Future | Chytridiomycosis |
| AMPHIBIA | <i>Crinia</i>     | <i>georgiana</i>        | LC | Hypothesized/Future | Chytridiomycosis |
| AMPHIBIA | <i>Crinia</i>     | <i>pseudinsignifera</i> | LC | Hypothesized/Future | Chytridiomycosis |

|          |                          |                     |    |                     |                  |
|----------|--------------------------|---------------------|----|---------------------|------------------|
| AMPHIBIA | <i>Crossodactylus</i>    | <i>caramaschii</i>  | LC | Hypothesized/Future | Chytridiomycosis |
| AMPHIBIA | <i>Cryptotriton</i>      | <i>monzoni</i>      | CR | Hypothesized/Future | Chytridiomycosis |
| AMPHIBIA | <i>Cycloramphus</i>      | <i>boraceinsis</i>  | LC | Hypothesized/Future | Chytridiomycosis |
| AMPHIBIA | <i>Cycloramphus</i>      | <i>semipalmatus</i> | NT | Hypothesized/Future | Chytridiomycosis |
| AMPHIBIA | <i>Duellmanohyla</i>     | <i>chamulae</i>     | EN | Hypothesized/Future | Chytridiomycosis |
| AMPHIBIA | <i>Duellmanohyla</i>     | <i>ignicolor</i>    | EN | Hypothesized/Future | Chytridiomycosis |
| AMPHIBIA | <i>Duellmanohyla</i>     | <i>lythrodes</i>    | EN | Hypothesized/Future | Chytridiomycosis |
| AMPHIBIA | <i>Duellmanohyla</i>     | <i>salvavida</i>    | CR | Hypothesized/Future | Chytridiomycosis |
| AMPHIBIA | <i>Duellmanohyla</i>     | <i>schmidtorum</i>  | VU | Hypothesized/Future | Chytridiomycosis |
| AMPHIBIA | <i>Duellmanohyla</i>     | <i>soralia</i>      | CR | Evidence            | Chytridiomycosis |
| AMPHIBIA | <i>Duellmanohyla</i>     | <i>uranochroa</i>   | CR | Evidence            | Chytridiomycosis |
| AMPHIBIA | <i>Ecnomiohyla</i>       | <i>echinata</i>     | CR | Hypothesized/Future | Chytridiomycosis |
| AMPHIBIA | <i>Ecnomiohyla</i>       | <i>raborum</i>      | CR | Hypothesized/Future | Chytridiomycosis |
| AMPHIBIA | <i>Eleutherodactylus</i> | <i>barlagnei</i>    | EN | Hypothesized/Future | Chytridiomycosis |
| AMPHIBIA | <i>Eleutherodactylus</i> | <i>cooki</i>        | VU | Hypothesized/Future | Chytridiomycosis |
| AMPHIBIA | <i>Eleutherodactylus</i> | <i>coqui</i>        | LC | Evidence            | Chytridiomycosis |
| AMPHIBIA | <i>Eleutherodactylus</i> | <i>eneidae</i>      | CR | Hypothesized/Future | Chytridiomycosis |
| AMPHIBIA | <i>Eleutherodactylus</i> | <i>gryllus</i>      | EN | Hypothesized/Future | Chytridiomycosis |
| AMPHIBIA | <i>Eleutherodactylus</i> | <i>hedricki</i>     | EN | Hypothesized/Future | Chytridiomycosis |
| AMPHIBIA | <i>Eleutherodactylus</i> | <i>jasperi</i>      | CR | Hypothesized/Future | Chytridiomycosis |
| AMPHIBIA | <i>Eleutherodactylus</i> | <i>karlschmidti</i> | CR | Hypothesized/Future | Chytridiomycosis |

|          |                          |                      |    |                     |                  |
|----------|--------------------------|----------------------|----|---------------------|------------------|
| AMPHIBIA | <i>Eleutherodactylus</i> | <i>locustus</i>      | CR | Hypothesized/Future | Chytridiomycosis |
| AMPHIBIA | <i>Eleutherodactylus</i> | <i>longipes</i>      | VU | Hypothesized/Future | Chytridiomycosis |
| AMPHIBIA | <i>Eleutherodactylus</i> | <i>orcutti</i>       | CR | Hypothesized/Future | Chytridiomycosis |
| AMPHIBIA | <i>Eleutherodactylus</i> | <i>patriciae</i>     | EN | Evidence            | Chytridiomycosis |
| AMPHIBIA | <i>Eleutherodactylus</i> | <i>pituinus</i>      | EN | Evidence            | Chytridiomycosis |
| AMPHIBIA | <i>Eleutherodactylus</i> | <i>portoricensis</i> | EN | Evidence            | Chytridiomycosis |
| AMPHIBIA | <i>Eleutherodactylus</i> | <i>richmondi</i>     | CR | Hypothesized/Future | Chytridiomycosis |
| AMPHIBIA | <i>Eleutherodactylus</i> | <i>ruthae</i>        | EN | Hypothesized/Future | Chytridiomycosis |
| AMPHIBIA | <i>Eleutherodactylus</i> | <i>schmidti</i>      | CR | Hypothesized/Future | Chytridiomycosis |
| AMPHIBIA | <i>Eleutherodactylus</i> | <i>semipalmatus</i>  | CR | Hypothesized/Future | Chytridiomycosis |
| AMPHIBIA | <i>Eleutherodactylus</i> | <i>symingtoni</i>    | CR | Evidence            | Chytridiomycosis |
| AMPHIBIA | <i>Eleutherodactylus</i> | <i>turquinensis</i>  | CR | Hypothesized/Future | Chytridiomycosis |
| AMPHIBIA | <i>Eleutherodactylus</i> | <i>unicolor</i>      | VU | Hypothesized/Future | Chytridiomycosis |
| AMPHIBIA | <i>Eleutherodactylus</i> | <i>wightmanae</i>    | EN | Hypothesized/Future | Chytridiomycosis |
| AMPHIBIA | <i>Epidalea</i>          | <i>calamita</i>      | LC | Evidence            | Chytridiomycosis |
| AMPHIBIA | <i>Epipedobates</i>      | <i>boulengeri</i>    | LC | Hypothesized/Future | Chytridiomycosis |
| AMPHIBIA | <i>Epipedobates</i>      | <i>tricolor</i>      | EN | Hypothesized/Future | Chytridiomycosis |
| AMPHIBIA | <i>Euproctus</i>         | <i>platycephalus</i> | EN | Evidence            | Chytridiomycosis |
| AMPHIBIA | <i>Exerodonta</i>        | <i>juanitae</i>      | VU | Hypothesized/Future | Chytridiomycosis |
| AMPHIBIA | <i>Exerodonta</i>        | <i>melanomma</i>     | VU | Hypothesized/Future | Chytridiomycosis |
| AMPHIBIA | <i>Exerodonta</i>        | <i>perkinsi</i>      | CR | Hypothesized/Future | Chytridiomycosis |

|          |                          |                        |    |                     |                  |
|----------|--------------------------|------------------------|----|---------------------|------------------|
| AMPHIBIA | <i>Exerodonta</i>        | <i>pinorum</i>         | VU | Hypothesized/Future | Chytridiomycosis |
| AMPHIBIA | <i>Gastrotheca</i>       | <i>cornuta</i>         | EN | Evidence            | Chytridiomycosis |
| AMPHIBIA | <i>Gastrotheca</i>       | <i>dendronastes</i>    | VU | Hypothesized/Future | Chytridiomycosis |
| AMPHIBIA | <i>Gastrotheca</i>       | <i>guentheri</i>       | VU | Hypothesized/Future | Chytridiomycosis |
| AMPHIBIA | <i>Gastrotheca</i>       | <i>litedis</i>         | EN | Hypothesized/Future | Chytridiomycosis |
| AMPHIBIA | <i>Gastrotheca</i>       | <i>longipes</i>        | LC | Hypothesized/Future | Chytridiomycosis |
| AMPHIBIA | <i>Gastrotheca</i>       | <i>monticola</i>       | LC | Hypothesized/Future | Unnamed Disease  |
| AMPHIBIA | <i>Gastrotheca</i>       | <i>orophylax</i>       | EN | Hypothesized/Future | Chytridiomycosis |
| AMPHIBIA | <i>Gastrotheca</i>       | <i>ovifera</i>         | EN | Hypothesized/Future | Chytridiomycosis |
| AMPHIBIA | <i>Gastrotheca</i>       | <i>piperata</i>        | LC | Hypothesized/Future | Chytridiomycosis |
| AMPHIBIA | <i>Gastrotheca</i>       | <i>plumbea</i>         | VU | Hypothesized/Future | Chytridiomycosis |
| AMPHIBIA | <i>Gastrotheca</i>       | <i>pseustes</i>        | EN | Evidence            | Chytridiomycosis |
| AMPHIBIA | <i>Gastrotheca</i>       | <i>riobambae</i>       | EN | Hypothesized/Future | Chytridiomycosis |
| AMPHIBIA | <i>Gastrotheca</i>       | <i>splendens</i>       | EN | Hypothesized/Future | Chytridiomycosis |
| AMPHIBIA | <i>Geocrinia</i>         | <i>rosea</i>           | LC | Hypothesized/Future | Chytridiomycosis |
| AMPHIBIA | <i>Heleioporus</i>       | <i>australiacus</i>    | VU | Evidence            | Chytridiomycosis |
| AMPHIBIA | <i>Heleioporus</i>       | <i>eyrei</i>           | LC | Hypothesized/Future | Chytridiomycosis |
| AMPHIBIA | <i>Hyalinobatrachium</i> | <i>fleischmanni</i>    | LC | Evidence            | Chytridiomycosis |
| AMPHIBIA | <i>Hyalinobatrachium</i> | <i>guairarepanense</i> | EN | Hypothesized/Future | Chytridiomycosis |
| AMPHIBIA | <i>Hyla</i>              | <i>bocourti</i>        | CR | Hypothesized/Future | Chytridiomycosis |
| AMPHIBIA | <i>Hylarana</i>          | <i>chalconota</i>      | LC | Hypothesized/Future | Chytridiomycosis |



|          |                    |                       |    |                     |                  |
|----------|--------------------|-----------------------|----|---------------------|------------------|
| AMPHIBIA | <i>Hylodes</i>     | <i>meridionalis</i>   | LC | Hypothesized/Future | Chytridiomycosis |
| AMPHIBIA | <i>Hylodes</i>     | <i>perplicatus</i>    | LC | Hypothesized/Future | Chytridiomycosis |
| AMPHIBIA | <i>Hylodes</i>     | <i>phyllodes</i>      | LC | Hypothesized/Future | Chytridiomycosis |
| AMPHIBIA | <i>Hylomantis</i>  | <i>lemur</i>          | CR | Hypothesized/Future | Chytridiomycosis |
| AMPHIBIA | <i>Hyloscirtus</i> | <i>armatus</i>        | LC | Hypothesized/Future | Chytridiomycosis |
| AMPHIBIA | <i>Hyloscirtus</i> | <i>bogotensis</i>     | NT | Evidence            | Chytridiomycosis |
| AMPHIBIA | <i>Hyloscirtus</i> | <i>colymba</i>        | CR | Hypothesized/Future | Chytridiomycosis |
| AMPHIBIA | <i>Hyloscirtus</i> | <i>lindae</i>         | VU | Hypothesized/Future | Chytridiomycosis |
| AMPHIBIA | <i>Hyloscirtus</i> | <i>pantostictus</i>   | EN | Hypothesized/Future | Chytridiomycosis |
| AMPHIBIA | <i>Hyloscirtus</i> | <i>platydactylus</i>  | VU | Hypothesized/Future | Chytridiomycosis |
| AMPHIBIA | <i>Hyloscirtus</i> | <i>psarolaimus</i>    | EN | Hypothesized/Future | Chytridiomycosis |
| AMPHIBIA | <i>Hyloscirtus</i> | <i>ptychodactylus</i> | CR | Hypothesized/Future | Chytridiomycosis |
| AMPHIBIA | <i>Hyloscirtus</i> | <i>staufferorum</i>   | EN | Hypothesized/Future | Chytridiomycosis |
| AMPHIBIA | <i>Hyloscirtus</i> | <i>torrenticola</i>   | VU | Hypothesized/Future | Chytridiomycosis |
| AMPHIBIA | <i>Hyloxalus</i>   | <i>anthracinus</i>    | CR | Hypothesized/Future | Chytridiomycosis |
| AMPHIBIA | <i>Hyloxalus</i>   | <i>bocagei</i>        | LC | Hypothesized/Future | Chytridiomycosis |
| AMPHIBIA | <i>Hyloxalus</i>   | <i>delatorreae</i>    | CR | Hypothesized/Future | Chytridiomycosis |
| AMPHIBIA | <i>Hyloxalus</i>   | <i>elachyhistus</i>   | EN | Hypothesized/Future | Chytridiomycosis |
| AMPHIBIA | <i>Hyloxalus</i>   | <i>lehmanni</i>       | NT | Hypothesized/Future | Chytridiomycosis |
| AMPHIBIA | <i>Hyloxalus</i>   | <i>pulchellus</i>     | VU | Hypothesized/Future | Chytridiomycosis |
| AMPHIBIA | <i>Hyloxalus</i>   | <i>vertebralis</i>    | CR | Hypothesized/Future | Chytridiomycosis |

|          |                     |                       |    |                     |                  |
|----------|---------------------|-----------------------|----|---------------------|------------------|
| AMPHIBIA | <i>Hypodactylus</i> | <i>dolops</i>         | VU | Hypothesized/Future | Chytridiomycosis |
| AMPHIBIA | <i>Hypsiboas</i>    | <i>albopunctatus</i>  | LC | Hypothesized/Future | Chytridiomycosis |
| AMPHIBIA | <i>Hypsiboas</i>    | <i>cymbalum</i>       | CR | Hypothesized/Future | Chytridiomycosis |
| AMPHIBIA | <i>Hypsiboas</i>    | <i>semilineatus</i>   | LC | Hypothesized/Future | Chytridiomycosis |
| AMPHIBIA | <i>Incilius</i>     | <i>cycladen</i>       | VU | Hypothesized/Future | Chytridiomycosis |
| AMPHIBIA | <i>Incilius</i>     | <i>fastidiosus</i>    | CR | Hypothesized/Future | Chytridiomycosis |
| AMPHIBIA | <i>Incilius</i>     | <i>holdridgei</i>     | EX | Hypothesized/Future | Chytridiomycosis |
| AMPHIBIA | <i>Incilius</i>     | <i>ibarraii</i>       | EN | Hypothesized/Future | Chytridiomycosis |
| AMPHIBIA | <i>Incilius</i>     | <i>melanochlorus</i>  | LC | Hypothesized/Future | Chytridiomycosis |
| AMPHIBIA | <i>Incilius</i>     | <i>periglenes</i>     | EX | Hypothesized/Future | Chytridiomycosis |
| AMPHIBIA | <i>Incilius</i>     | <i>peripatetes</i>    | CR | Hypothesized/Future | Chytridiomycosis |
| AMPHIBIA | <i>Incilius</i>     | <i>tacanensis</i>     | EN | Hypothesized/Future | Chytridiomycosis |
| AMPHIBIA | <i>Incilius</i>     | <i>tutelarius</i>     | EN | Hypothesized/Future | Chytridiomycosis |
| AMPHIBIA | <i>Isthmohyla</i>   | <i>angustilineata</i> | CR | Hypothesized/Future | Chytridiomycosis |
| AMPHIBIA | <i>Isthmohyla</i>   | <i>calypsa</i>        | CR | Hypothesized/Future | Chytridiomycosis |
| AMPHIBIA | <i>Isthmohyla</i>   | <i>debilis</i>        | CR | Hypothesized/Future | Chytridiomycosis |
| AMPHIBIA | <i>Isthmohyla</i>   | <i>graceae</i>        | CR | Evidence            | Chytridiomycosis |
| AMPHIBIA | <i>Isthmohyla</i>   | <i>pictipes</i>       | EN | Hypothesized/Future | Chytridiomycosis |
| AMPHIBIA | <i>Isthmohyla</i>   | <i>pseudopuma</i>     | LC | Hypothesized/Future | Chytridiomycosis |
| AMPHIBIA | <i>Isthmohyla</i>   | <i>rivularis</i>      | CR | Evidence            | Chytridiomycosis |
| AMPHIBIA | <i>Isthmohyla</i>   | <i>tica</i>           | CR | Hypothesized/Future | Chytridiomycosis |

|          |                       |                        |    |                     |                   |
|----------|-----------------------|------------------------|----|---------------------|-------------------|
| AMPHIBIA | <i>Leiopelma</i>      | <i>archeyi</i>         | CR | Evidence            | Chytridiomycosis  |
| AMPHIBIA | <i>Leiopelma</i>      | <i>hamiltoni</i>       | EN | Hypothesized/Future | Chytridiomycosis  |
| AMPHIBIA | <i>Leiopelma</i>      | <i>hochstetteri</i>    | VU | Hypothesized/Future | Chytridiomycosis  |
| AMPHIBIA | <i>Leiopelma</i>      | <i>pakeka</i>          | VU | Hypothesized/Future | Chytridiomycosis  |
| AMPHIBIA | <i>Leptobranchium</i> | <i>hasseltii</i>       | LC | Hypothesized/Future | Chytridiomycosis  |
| AMPHIBIA | <i>Leptodactylus</i>  | <i>fallax</i>          | CR | Evidence            | Chytridiomycosis  |
| AMPHIBIA | <i>Leptophryne</i>    | <i>cruentata</i>       | CR | Hypothesized/Future | Chytridiomycosis  |
| AMPHIBIA | <i>Limnodynastes</i>  | <i>dumerilii</i>       | LC | Hypothesized/Future | Chytridiomycosis  |
| AMPHIBIA | <i>Limnodynastes</i>  | <i>tasmaniensis</i>    | LC | Hypothesized/Future | Chytridiomycosis  |
| AMPHIBIA | <i>Lissotriton</i>    | <i>boscai</i>          | LC | Evidence            | Iridovirus        |
| AMPHIBIA | <i>Lithobates</i>     | <i>chiricahuensis</i>  | VU | Evidence            | Chytridiomycosis  |
| AMPHIBIA | <i>Lithobates</i>     | <i>omiltemanus</i>     | CR | Hypothesized/Future | Chytridiomycosis  |
| AMPHIBIA | <i>Lithobates</i>     | <i>pipiens</i>         | LC | Evidence            | Red-leg disease   |
| AMPHIBIA | <i>Lithobates</i>     | <i>sevosus</i>         | CR | Evidence            | Multiple Diseases |
| AMPHIBIA | <i>Lithobates</i>     | <i>sierramadrensis</i> | VU | Hypothesized/Future | Chytridiomycosis  |
| AMPHIBIA | <i>Lithobates</i>     | <i>subaquavocalis</i>  | CR | Evidence            | Chytridiomycosis  |
| AMPHIBIA | <i>Lithobates</i>     | <i>tarahumarae</i>     | VU | Evidence            | Chytridiomycosis  |
| AMPHIBIA | <i>Lithobates</i>     | <i>taylori</i>         | LC | Hypothesized/Future | Chytridiomycosis  |
| AMPHIBIA | <i>Lithobates</i>     | <i>vibicarius</i>      | CR | Evidence            | Chytridiomycosis  |
| AMPHIBIA | <i>Lithobates</i>     | <i>warsezewitschii</i> | LC | Hypothesized/Future | Chytridiomycosis  |
| AMPHIBIA | <i>Lithobates</i>     | <i>yavapaiensis</i>    | LC | Hypothesized/Future | Chytridiomycosis  |

|          |                |                        |    |                     |                   |
|----------|----------------|------------------------|----|---------------------|-------------------|
| AMPHIBIA | <i>Litoria</i> | <i>adelaidensis</i>    | LC | Hypothesized/Future | Chytridiomycosis  |
| AMPHIBIA | <i>Litoria</i> | <i>aurea</i>           | VU | Evidence            | Chytridiomycosis  |
| AMPHIBIA | <i>Litoria</i> | <i>becki</i>           | VU | Hypothesized/Future | Chytridiomycosis  |
| AMPHIBIA | <i>Litoria</i> | <i>booroolongensis</i> | CR | Hypothesized/Future | Chytridiomycosis  |
| AMPHIBIA | <i>Litoria</i> | <i>caerulea</i>        | LC | Hypothesized/Future | Chytridiomycosis  |
| AMPHIBIA | <i>Litoria</i> | <i>castanea</i>        | CR | Hypothesized/Future | Multiple Diseases |
| AMPHIBIA | <i>Litoria</i> | <i>dayi</i>            | EN | Evidence            | Multiple Diseases |
| AMPHIBIA | <i>Litoria</i> | <i>ewingii</i>         | LC | Hypothesized/Future | Chytridiomycosis  |
| AMPHIBIA | <i>Litoria</i> | <i>genimaculata</i>    | LC | Evidence            | Chytridiomycosis  |
| AMPHIBIA | <i>Litoria</i> | <i>lesueurii</i>       | LC | Hypothesized/Future | Chytridiomycosis  |
| AMPHIBIA | <i>Litoria</i> | <i>lorica</i>          | CR | Hypothesized/Future | Multiple Diseases |
| AMPHIBIA | <i>Litoria</i> | <i>moorei</i>          | LC | Hypothesized/Future | Chytridiomycosis  |
| AMPHIBIA | <i>Litoria</i> | <i>myola</i>           | CR | Hypothesized/Future | Multiple Diseases |
| AMPHIBIA | <i>Litoria</i> | <i>nannotis</i>        | EN | Hypothesized/Future | Multiple Diseases |
| AMPHIBIA | <i>Litoria</i> | <i>nudidigita</i>      | LC | Hypothesized/Future | Chytridiomycosis  |
| AMPHIBIA | <i>Litoria</i> | <i>nyakalensis</i>     | CR | Hypothesized/Future | Multiple Diseases |
| AMPHIBIA | <i>Litoria</i> | <i>pearsoniana</i>     | NT | Evidence            | Chytridiomycosis  |
| AMPHIBIA | <i>Litoria</i> | <i>phyllochroa</i>     | LC | Hypothesized/Future | Chytridiomycosis  |
| AMPHIBIA | <i>Litoria</i> | <i>piperata</i>        | CR | Hypothesized/Future | Chytridiomycosis  |
| AMPHIBIA | <i>Litoria</i> | <i>raniformis</i>      | EN | Evidence            | Chytridiomycosis  |
| AMPHIBIA | <i>Litoria</i> | <i>rheocola</i>        | EN | Evidence            | Chytridiomycosis  |

|          |                        |                        |    |                     |                   |
|----------|------------------------|------------------------|----|---------------------|-------------------|
| AMPHIBIA | <i>Litoria</i>         | <i>spenceri</i>        | CR | Evidence            | Chytridiomycosis  |
| AMPHIBIA | <i>Litoria</i>         | <i>verreauxii</i>      | LC | Hypothesized/Future | Chytridiomycosis  |
| AMPHIBIA | <i>Mannophryne</i>     | <i>caquetio</i>        | CR | Hypothesized/Future | Multiple Diseases |
| AMPHIBIA | <i>Mannophryne</i>     | <i>cordilleriana</i>   | CR | Evidence            | Chytridiomycosis  |
| AMPHIBIA | <i>Mannophryne</i>     | <i>herminae</i>        | NT | Hypothesized/Future | Chytridiomycosis  |
| AMPHIBIA | <i>Mannophryne</i>     | <i>lamarcai</i>        | CR | Hypothesized/Future | Chytridiomycosis  |
| AMPHIBIA | <i>Mannophryne</i>     | <i>neblina</i>         | CR | Hypothesized/Future | Chytridiomycosis  |
| AMPHIBIA | <i>Mannophryne</i>     | <i>olmonae</i>         | CR | Hypothesized/Future | Chytridiomycosis  |
| AMPHIBIA | <i>Mannophryne</i>     | <i>riveroi</i>         | EN | Hypothesized/Future | Chytridiomycosis  |
| AMPHIBIA | <i>Megastomatohyla</i> | <i>pellita</i>         | CR | Hypothesized/Future | Chytridiomycosis  |
| AMPHIBIA | <i>Mixophyes</i>       | <i>balbus</i>          | VU | Hypothesized/Future | Chytridiomycosis  |
| AMPHIBIA | <i>Mixophyes</i>       | <i>fleayi</i>          | EN | Evidence            | Chytridiomycosis  |
| AMPHIBIA | <i>Nectophrynoides</i> | <i>asperginis</i>      | EW | Evidence            | Chytridiomycosis  |
| AMPHIBIA | <i>Nymphargus</i>      | <i>griffithsi</i>      | VU | Hypothesized/Future | Chytridiomycosis  |
| AMPHIBIA | <i>Nymphargus</i>      | <i>megacheirus</i>     | EN | Hypothesized/Future | Chytridiomycosis  |
| AMPHIBIA | <i>Oedipina</i>        | <i>poelzi</i>          | EN | Hypothesized/Future | Chytridiomycosis  |
| AMPHIBIA | <i>Oophaga</i>         | <i>arborea</i>         | EN | Hypothesized/Future | Chytridiomycosis  |
| AMPHIBIA | <i>Oophaga</i>         | <i>pumilio</i>         | LC | Hypothesized/Future | Chytridiomycosis  |
| AMPHIBIA | <i>Osteopilus</i>      | <i>pulchrilineatus</i> | EN | Hypothesized/Future | Chytridiomycosis  |
| AMPHIBIA | <i>Osteopilus</i>      | <i>vastus</i>          | EN | Evidence            | Chytridiomycosis  |
| AMPHIBIA | <i>Pelobates</i>       | <i>fuscus</i>          | LC | Hypothesized/Future | Chytridiomycosis  |

|          |                     |                       |    |                     |                  |
|----------|---------------------|-----------------------|----|---------------------|------------------|
| AMPHIBIA | <i>Pelophylax</i>   | <i>perezi</i>         | LC | Evidence            | Iridovirus       |
| AMPHIBIA | <i>Petropedetes</i> | <i>dutoiti</i>        | CR | Hypothesized/Future | Chytridiomycosis |
| AMPHIBIA | <i>Petropedetes</i> | <i>martiensseni</i>   | EN | Hypothesized/Future | Chytridiomycosis |
| AMPHIBIA | <i>Petropedetes</i> | <i>yakusini</i>       | EN | Evidence            | Chytridiomycosis |
| AMPHIBIA | <i>Phyloria</i>     | <i>frosti</i>         | CR | Hypothesized/Future | Chytridiomycosis |
| AMPHIBIA | <i>Phrynomedusa</i> | <i>appendiculata</i>  | NT | Hypothesized/Future | Chytridiomycosis |
| AMPHIBIA | <i>Phrynomedusa</i> | <i>marginata</i>      | LC | Hypothesized/Future | Chytridiomycosis |
| AMPHIBIA | <i>Phyllobates</i>  | <i>bicolor</i>        | NT | Hypothesized/Future | Chytridiomycosis |
| AMPHIBIA | <i>Phyllobates</i>  | <i>lugubris</i>       | LC | Hypothesized/Future | Chytridiomycosis |
| AMPHIBIA | <i>Phyllomedusa</i> | <i>ecuatoriana</i>    | EN | Hypothesized/Future | Chytridiomycosis |
| AMPHIBIA | <i>Plectrohyla</i>  | <i>acanthodes</i>     | CR | Hypothesized/Future | Chytridiomycosis |
| AMPHIBIA | <i>Plectrohyla</i>  | <i>arborescandens</i> | EN | Hypothesized/Future | Chytridiomycosis |
| AMPHIBIA | <i>Plectrohyla</i>  | <i>avia</i>           | CR | Hypothesized/Future | Chytridiomycosis |
| AMPHIBIA | <i>Plectrohyla</i>  | <i>bistincta</i>      | LC | Hypothesized/Future | Chytridiomycosis |
| AMPHIBIA | <i>Plectrohyla</i>  | <i>calthula</i>       | CR | Hypothesized/Future | Chytridiomycosis |
| AMPHIBIA | <i>Plectrohyla</i>  | <i>calvicollina</i>   | CR | Hypothesized/Future | Chytridiomycosis |
| AMPHIBIA | <i>Plectrohyla</i>  | <i>celata</i>         | CR | Hypothesized/Future | Chytridiomycosis |
| AMPHIBIA | <i>Plectrohyla</i>  | <i>cembra</i>         | CR | Hypothesized/Future | Chytridiomycosis |
| AMPHIBIA | <i>Plectrohyla</i>  | <i>charadricola</i>   | EN | Hypothesized/Future | Chytridiomycosis |
| AMPHIBIA | <i>Plectrohyla</i>  | <i>chryses</i>        | CR | Hypothesized/Future | Chytridiomycosis |
| AMPHIBIA | <i>Plectrohyla</i>  | <i>chrysopleura</i>   | CR | Evidence            | Chytridiomycosis |

|          |                    |                      |    |                     |                  |
|----------|--------------------|----------------------|----|---------------------|------------------|
| AMPHIBIA | <i>Plectrohyla</i> | <i>crassa</i>        | CR | Hypothesized/Future | Chytridiomycosis |
| AMPHIBIA | <i>Plectrohyla</i> | <i>cyanomma</i>      | CR | Hypothesized/Future | Chytridiomycosis |
| AMPHIBIA | <i>Plectrohyla</i> | <i>cyclada</i>       | EN | Hypothesized/Future | Chytridiomycosis |
| AMPHIBIA | <i>Plectrohyla</i> | <i>dasypus</i>       | CR | Evidence            | Chytridiomycosis |
| AMPHIBIA | <i>Plectrohyla</i> | <i>ephemera</i>      | CR | Hypothesized/Future | Chytridiomycosis |
| AMPHIBIA | <i>Plectrohyla</i> | <i>exquisita</i>     | CR | Evidence            | Chytridiomycosis |
| AMPHIBIA | <i>Plectrohyla</i> | <i>glandulosa</i>    | EN | Hypothesized/Future | Chytridiomycosis |
| AMPHIBIA | <i>Plectrohyla</i> | <i>guatemalensis</i> | CR | Hypothesized/Future | Chytridiomycosis |
| AMPHIBIA | <i>Plectrohyla</i> | <i>hartwegi</i>      | CR | Hypothesized/Future | Chytridiomycosis |
| AMPHIBIA | <i>Plectrohyla</i> | <i>hazela</i>        | CR | Hypothesized/Future | Chytridiomycosis |
| AMPHIBIA | <i>Plectrohyla</i> | <i>ixil</i>          | CR | Hypothesized/Future | Chytridiomycosis |
| AMPHIBIA | <i>Plectrohyla</i> | <i>lacertosa</i>     | EN | Hypothesized/Future | Chytridiomycosis |
| AMPHIBIA | <i>Plectrohyla</i> | <i>matudai</i>       | VU | Hypothesized/Future | Chytridiomycosis |
| AMPHIBIA | <i>Plectrohyla</i> | <i>mykter</i>        | EN | Hypothesized/Future | Chytridiomycosis |
| AMPHIBIA | <i>Plectrohyla</i> | <i>pachyderma</i>    | CR | Hypothesized/Future | Chytridiomycosis |
| AMPHIBIA | <i>Plectrohyla</i> | <i>pentheter</i>     | EN | Hypothesized/Future | Chytridiomycosis |
| AMPHIBIA | <i>Plectrohyla</i> | <i>pokomchi</i>      | CR | Hypothesized/Future | Chytridiomycosis |
| AMPHIBIA | <i>Plectrohyla</i> | <i>psarosema</i>     | CR | Hypothesized/Future | Chytridiomycosis |
| AMPHIBIA | <i>Plectrohyla</i> | <i>psiloderma</i>    | EN | Hypothesized/Future | Chytridiomycosis |
| AMPHIBIA | <i>Plectrohyla</i> | <i>pynochila</i>     | CR | Hypothesized/Future | Chytridiomycosis |
| AMPHIBIA | <i>Plectrohyla</i> | <i>quecchi</i>       | CR | Hypothesized/Future | Chytridiomycosis |

|          |                     |                        |    |                     |                   |
|----------|---------------------|------------------------|----|---------------------|-------------------|
| AMPHIBIA | <i>Plectrohyla</i>  | <i>robertsorum</i>     | EN | Hypothesized/Future | Chytridiomycosis  |
| AMPHIBIA | <i>Plectrohyla</i>  | <i>sabrina</i>         | CR | Hypothesized/Future | Chytridiomycosis  |
| AMPHIBIA | <i>Plectrohyla</i>  | <i>sagorum</i>         | EN | Hypothesized/Future | Chytridiomycosis  |
| AMPHIBIA | <i>Plectrohyla</i>  | <i>siopela</i>         | CR | Hypothesized/Future | Chytridiomycosis  |
| AMPHIBIA | <i>Plectrohyla</i>  | <i>tecunumani</i>      | CR | Hypothesized/Future | Chytridiomycosis  |
| AMPHIBIA | <i>Plectrohyla</i>  | <i>teuchestes</i>      | CR | Hypothesized/Future | Chytridiomycosis  |
| AMPHIBIA | <i>Plectrohyla</i>  | <i>thorectes</i>       | CR | Hypothesized/Future | Chytridiomycosis  |
| AMPHIBIA | <i>Pleurodema</i>   | <i>marmoratum</i>      | LC | Hypothesized/Future | Chytridiomycosis  |
| AMPHIBIA | <i>Pristimantis</i> | <i>albericoi</i>       | CR | Hypothesized/Future | Chytridiomycosis  |
| AMPHIBIA | <i>Pristimantis</i> | <i>bicolor</i>         | VU | Hypothesized/Future | Chytridiomycosis  |
| AMPHIBIA | <i>Pristimantis</i> | <i>calcarulatus</i>    | VU | Hypothesized/Future | Chytridiomycosis  |
| AMPHIBIA | <i>Pristimantis</i> | <i>caprifer</i>        | LC | Hypothesized/Future | Chytridiomycosis  |
| AMPHIBIA | <i>Pristimantis</i> | <i>caryophyllaceus</i> | NT | Hypothesized/Future | Chytridiomycosis  |
| AMPHIBIA | <i>Pristimantis</i> | <i>chalceus</i>        | LC | Hypothesized/Future | Chytridiomycosis  |
| AMPHIBIA | <i>Pristimantis</i> | <i>corrugatus</i>      | LC | Hypothesized/Future | Multiple Diseases |
| AMPHIBIA | <i>Pristimantis</i> | <i>cremnobates</i>     | EN | Hypothesized/Future | Chytridiomycosis  |
| AMPHIBIA | <i>Pristimantis</i> | <i>crenunguis</i>      | EN | Hypothesized/Future | Chytridiomycosis  |
| AMPHIBIA | <i>Pristimantis</i> | <i>crucifer</i>        | VU | Hypothesized/Future | Chytridiomycosis  |
| AMPHIBIA | <i>Pristimantis</i> | <i>cruentus</i>        | LC | Hypothesized/Future | Chytridiomycosis  |
| AMPHIBIA | <i>Pristimantis</i> | <i>dendrobatoides</i>  | LC | Hypothesized/Future | Multiple Diseases |
| AMPHIBIA | <i>Pristimantis</i> | <i>diaphonus</i>       | VU | Hypothesized/Future | Chytridiomycosis  |



|          |                     |                       |    |                     |                   |
|----------|---------------------|-----------------------|----|---------------------|-------------------|
| AMPHIBIA | <i>Pristimantis</i> | <i>diogenes</i>       | VU | Hypothesized/Future | Chytridiomycosis  |
| AMPHIBIA | <i>Pristimantis</i> | <i>duellmani</i>      | VU | Hypothesized/Future | Chytridiomycosis  |
| AMPHIBIA | <i>Pristimantis</i> | <i>fallax</i>         | EN | Hypothesized/Future | Chytridiomycosis  |
| AMPHIBIA | <i>Pristimantis</i> | <i>fetusus</i>        | EN | Hypothesized/Future | Chytridiomycosis  |
| AMPHIBIA | <i>Pristimantis</i> | <i>ginesi</i>         | EN | Hypothesized/Future | Chytridiomycosis  |
| AMPHIBIA | <i>Pristimantis</i> | <i>gracilis</i>       | VU | Hypothesized/Future | Chytridiomycosis  |
| AMPHIBIA | <i>Pristimantis</i> | <i>ignicolor</i>      | EN | Hypothesized/Future | Chytridiomycosis  |
| AMPHIBIA | <i>Pristimantis</i> | <i>incanus</i>        | EN | Hypothesized/Future | Chytridiomycosis  |
| AMPHIBIA | <i>Pristimantis</i> | <i>jester</i>         | LC | Hypothesized/Future | Multiple Diseases |
| AMPHIBIA | <i>Pristimantis</i> | <i>jorgevelosai</i>   | EN | Hypothesized/Future | Chytridiomycosis  |
| AMPHIBIA | <i>Pristimantis</i> | <i>labiosus</i>       | LC | Hypothesized/Future | Chytridiomycosis  |
| AMPHIBIA | <i>Pristimantis</i> | <i>lancinii</i>       | EN | Hypothesized/Future | Chytridiomycosis  |
| AMPHIBIA | <i>Pristimantis</i> | <i>lichenoides</i>    | CR | Hypothesized/Future | Chytridiomycosis  |
| AMPHIBIA | <i>Pristimantis</i> | <i>lymani</i>         | LC | Hypothesized/Future | Chytridiomycosis  |
| AMPHIBIA | <i>Pristimantis</i> | <i>molybrignus</i>    | NT | Hypothesized/Future | Chytridiomycosis  |
| AMPHIBIA | <i>Pristimantis</i> | <i>nigrogriseus</i>   | VU | Hypothesized/Future | Chytridiomycosis  |
| AMPHIBIA | <i>Pristimantis</i> | <i>penelopus</i>      | VU | Hypothesized/Future | Chytridiomycosis  |
| AMPHIBIA | <i>Pristimantis</i> | <i>prolatus</i>       | EN | Hypothesized/Future | Chytridiomycosis  |
| AMPHIBIA | <i>Pristimantis</i> | <i>quinquagesimus</i> | VU | Hypothesized/Future | Chytridiomycosis  |
| AMPHIBIA | <i>Pristimantis</i> | <i>ruedai</i>         | VU | Hypothesized/Future | Chytridiomycosis  |
| AMPHIBIA | <i>Pristimantis</i> | <i>saltissimus</i>    | LC | Hypothesized/Future | Multiple Diseases |

|          |                      |                       |    |                     |                   |
|----------|----------------------|-----------------------|----|---------------------|-------------------|
| AMPHIBIA | <i>Pristimantis</i>  | <i>sanctaemartae</i>  | NT | Hypothesized/Future | Chytridiomycosis  |
| AMPHIBIA | <i>Pristimantis</i>  | <i>sanguineus</i>     | NT | Hypothesized/Future | Chytridiomycosis  |
| AMPHIBIA | <i>Pristimantis</i>  | <i>savagei</i>        | NT | Hypothesized/Future | Chytridiomycosis  |
| AMPHIBIA | <i>Pristimantis</i>  | <i>schultei</i>       | VU | Hypothesized/Future | Multiple Diseases |
| AMPHIBIA | <i>Pristimantis</i>  | <i>scoloblepharus</i> | EN | Hypothesized/Future | Chytridiomycosis  |
| AMPHIBIA | <i>Pristimantis</i>  | <i>scolodiscus</i>    | EN | Hypothesized/Future | Chytridiomycosis  |
| AMPHIBIA | <i>Pristimantis</i>  | <i>signifer</i>       | VU | Hypothesized/Future | Chytridiomycosis  |
| AMPHIBIA | <i>Pristimantis</i>  | <i>sulculus</i>       | EN | Hypothesized/Future | Chytridiomycosis  |
| AMPHIBIA | <i>Pristimantis</i>  | <i>tamsitti</i>       | NT | Hypothesized/Future | Chytridiomycosis  |
| AMPHIBIA | <i>Pristimantis</i>  | <i>uranobates</i>     | LC | Hypothesized/Future | Chytridiomycosis  |
| AMPHIBIA | <i>Pristimantis</i>  | <i>urichi</i>         | EN | Hypothesized/Future | Chytridiomycosis  |
| AMPHIBIA | <i>Pristimantis</i>  | <i>verecundus</i>     | VU | Hypothesized/Future | Chytridiomycosis  |
| AMPHIBIA | <i>Pristimantis</i>  | <i>vertebralis</i>    | VU | Hypothesized/Future | Chytridiomycosis  |
| AMPHIBIA | <i>Pristimantis</i>  | <i>vicarius</i>       | NT | Hypothesized/Future | Chytridiomycosis  |
| AMPHIBIA | <i>Pristimantis</i>  | <i>w-nigrum</i>       | LC | Hypothesized/Future | Chytridiomycosis  |
| AMPHIBIA | <i>Pristimantis</i>  | <i>zophus</i>         | EN | Hypothesized/Future | Chytridiomycosis  |
| AMPHIBIA | <i>Prostherapis</i>  | <i>dunni</i>          | CR | Hypothesized/Future | Chytridiomycosis  |
| AMPHIBIA | <i>Pseudacris</i>    | <i>triseriata</i>     | LC | Hypothesized/Future | Chytridiomycosis  |
| AMPHIBIA | <i>Pseudoeurycea</i> | <i>unguidentis</i>    | CR | Hypothesized/Future | Chytridiomycosis  |
| AMPHIBIA | <i>Pseudophryne</i>  | <i>corroboree</i>     | CR | Evidence            | Chytridiomycosis  |
| AMPHIBIA | <i>Pseudophryne</i>  | <i>pengilleyi</i>     | EN | Evidence            | Chytridiomycosis  |

|          |                   |                          |    |                     |                                 |
|----------|-------------------|--------------------------|----|---------------------|---------------------------------|
| AMPHIBIA | <i>Ptychadena</i> | <i>anchietae</i>         | LC | Hypothesized/Future | Chytridiomycosis                |
| AMPHIBIA | <i>Ptychohyla</i> | <i>dendrophasma</i>      | CR | Hypothesized/Future | Chytridiomycosis                |
| AMPHIBIA | <i>Ptychohyla</i> | <i>erythromma</i>        | EN | Hypothesized/Future | Chytridiomycosis                |
| AMPHIBIA | <i>Ptychohyla</i> | <i>euthysanota</i>       | NT | Hypothesized/Future | Chytridiomycosis                |
| AMPHIBIA | <i>Ptychohyla</i> | <i>hypomykter</i>        | CR | Evidence            | Chytridiomycosis                |
| AMPHIBIA | <i>Ptychohyla</i> | <i>legleri</i>           | EN | Hypothesized/Future | Chytridiomycosis                |
| AMPHIBIA | <i>Ptychohyla</i> | <i>leonhardschultzei</i> | EN | Hypothesized/Future | Chytridiomycosis                |
| AMPHIBIA | <i>Ptychohyla</i> | <i>macrotympanum</i>     | CR | Hypothesized/Future | Chytridiomycosis                |
| AMPHIBIA | <i>Ptychohyla</i> | <i>panchoi</i>           | EN | Hypothesized/Future | Chytridiomycosis                |
| AMPHIBIA | <i>Ptychohyla</i> | <i>salvadorensis</i>     | EN | Hypothesized/Future | Chytridiomycosis                |
| AMPHIBIA | <i>Ptychohyla</i> | <i>sanctaecrucis</i>     | CR | Hypothesized/Future | Chytridiomycosis                |
| AMPHIBIA | <i>Ptychohyla</i> | <i>spinipollex</i>       | EN | Hypothesized/Future | Chytridiomycosis                |
| AMPHIBIA | <i>Rana</i>       | <i>arvalis</i>           | LC | Hypothesized/Future | Chytridiomycosis                |
| AMPHIBIA | <i>Rana</i>       | <i>aurora</i>            | LC | Evidence            | Unnamed Disease                 |
| AMPHIBIA | <i>Rana</i>       | <i>cascadae</i>          | NT | Evidence            | <i>Saprolegnia ferax</i> Fungus |
| AMPHIBIA | <i>Rana</i>       | <i>dalmatina</i>         | LC | Evidence            | Multiple Diseases               |
| AMPHIBIA | <i>Rana</i>       | <i>draytonii</i>         | VU | Hypothesized/Future | Unnamed Disease                 |
| AMPHIBIA | <i>Rana</i>       | <i>latastei</i>          | VU | Hypothesized/Future | Unnamed Disease                 |
| AMPHIBIA | <i>Rana</i>       | <i>muscosa</i>           | EN | Evidence            | Multiple Diseases               |
| AMPHIBIA | <i>Rana</i>       | <i>sierrae</i>           | EN | Evidence            | Multiple Diseases               |
| AMPHIBIA | <i>Ranitomeya</i> | <i>abdita</i>            | CR | Hypothesized/Future | Chytridiomycosis                |

|          |                      |                      |    |                     |                  |
|----------|----------------------|----------------------|----|---------------------|------------------|
| AMPHIBIA | <i>Rhacophorus</i>   | <i>margaritifera</i> | LC | Hypothesized/Future | Chytridiomycosis |
| AMPHIBIA | <i>Rhaebo</i>        | <i>haematiticus</i>  | LC | Hypothesized/Future | Chytridiomycosis |
| AMPHIBIA | <i>Rheobatrachus</i> | <i>silus</i>         | EX | Hypothesized/Future | Chytridiomycosis |
| AMPHIBIA | <i>Rheobatrachus</i> | <i>vitellinus</i>    | EX | Hypothesized/Future | Chytridiomycosis |
| AMPHIBIA | <i>Rhinella</i>      | <i>amabilis</i>      | CR | Hypothesized/Future | Unnamed Disease  |
| AMPHIBIA | <i>Rhinella</i>      | <i>chrysophora</i>   | EN | Hypothesized/Future | Chytridiomycosis |
| AMPHIBIA | <i>Rhinella</i>      | <i>quechua</i>       | VU | Evidence            | Unnamed Parasite |
| AMPHIBIA | <i>Rhinoderma</i>    | <i>darwinii</i>      | VU | Hypothesized/Future | Chytridiomycosis |
| AMPHIBIA | <i>Rhinoderma</i>    | <i>rufum</i>         | CR | Hypothesized/Future | Chytridiomycosis |
| AMPHIBIA | <i>Salamandra</i>    | <i>salamandra</i>    | LC | Hypothesized/Future | Chytridiomycosis |
| AMPHIBIA | <i>Scinax</i>        | <i>albicans</i>      | LC | Hypothesized/Future | Chytridiomycosis |
| AMPHIBIA | <i>Silverstoneia</i> | <i>nubicola</i>      | NT | Evidence            | Chytridiomycosis |
| AMPHIBIA | <i>Smilisca</i>      | <i>cyanosticta</i>   | NT | Hypothesized/Future | Chytridiomycosis |
| AMPHIBIA | <i>Strabomantis</i>  | <i>cheiroplethus</i> | VU | Hypothesized/Future | Chytridiomycosis |
| AMPHIBIA | <i>Strabomantis</i>  | <i>cornutus</i>      | VU | Hypothesized/Future | Chytridiomycosis |
| AMPHIBIA | <i>Strabomantis</i>  | <i>necerus</i>       | VU | Hypothesized/Future | Chytridiomycosis |
| AMPHIBIA | <i>Strongylopus</i>  | <i>grayii</i>        | LC | Hypothesized/Future | Chytridiomycosis |
| AMPHIBIA | <i>Strongylopus</i>  | <i>hymenopus</i>     | LC | Hypothesized/Future | Chytridiomycosis |
| AMPHIBIA | <i>Taudactylus</i>   | <i>acutirostris</i>  | CR | Evidence            | Chytridiomycosis |
| AMPHIBIA | <i>Taudactylus</i>   | <i>diurnus</i>       | EX | Hypothesized/Future | Chytridiomycosis |
| AMPHIBIA | <i>Taudactylus</i>   | <i>eungellensis</i>  | CR | Evidence            | Chytridiomycosis |

|          |                    |                        |    |                     |                   |
|----------|--------------------|------------------------|----|---------------------|-------------------|
| AMPHIBIA | <i>Taudactylus</i> | <i>liemi</i>           | NT | Hypothesized/Future | Chytridiomycosis  |
| AMPHIBIA | <i>Taudactylus</i> | <i>pleione</i>         | CR | Hypothesized/Future | Chytridiomycosis  |
| AMPHIBIA | <i>Taudactylus</i> | <i>rheophilus</i>      | CR | Hypothesized/Future | Multiple Diseases |
| AMPHIBIA | <i>Telmatobius</i> | <i>arequipensis</i>    | VU | Hypothesized/Future | Chytridiomycosis  |
| AMPHIBIA | <i>Telmatobius</i> | <i>atacamensis</i>     | CR | Hypothesized/Future | Chytridiomycosis  |
| AMPHIBIA | <i>Telmatobius</i> | <i>bolivianus</i>      | NT | Hypothesized/Future | Chytridiomycosis  |
| AMPHIBIA | <i>Telmatobius</i> | <i>brevipes</i>        | EN | Hypothesized/Future | Chytridiomycosis  |
| AMPHIBIA | <i>Telmatobius</i> | <i>brevirostris</i>    | EN | Hypothesized/Future | Chytridiomycosis  |
| AMPHIBIA | <i>Telmatobius</i> | <i>carrillae</i>       | VU | Hypothesized/Future | Chytridiomycosis  |
| AMPHIBIA | <i>Telmatobius</i> | <i>ceiorum</i>         | EN | Hypothesized/Future | Chytridiomycosis  |
| AMPHIBIA | <i>Telmatobius</i> | <i>cirrhacelis</i>     | CR | Hypothesized/Future | Multiple Diseases |
| AMPHIBIA | <i>Telmatobius</i> | <i>colanensis</i>      | EN | Hypothesized/Future | Chytridiomycosis  |
| AMPHIBIA | <i>Telmatobius</i> | <i>culeus</i>          | CR | Hypothesized/Future | Chytridiomycosis  |
| AMPHIBIA | <i>Telmatobius</i> | <i>degener</i>         | EN | Hypothesized/Future | Chytridiomycosis  |
| AMPHIBIA | <i>Telmatobius</i> | <i>edaphonastes</i>    | EN | Hypothesized/Future | Chytridiomycosis  |
| AMPHIBIA | <i>Telmatobius</i> | <i>espadai</i>         | CR | Evidence            | Chytridiomycosis  |
| AMPHIBIA | <i>Telmatobius</i> | <i>gigas</i>           | CR | Hypothesized/Future | Chytridiomycosis  |
| AMPHIBIA | <i>Telmatobius</i> | <i>hauthali</i>        | VU | Hypothesized/Future | Chytridiomycosis  |
| AMPHIBIA | <i>Telmatobius</i> | <i>hintoni</i>         | VU | Hypothesized/Future | Chytridiomycosis  |
| AMPHIBIA | <i>Telmatobius</i> | <i>hockingi</i>        | VU | Hypothesized/Future | Chytridiomycosis  |
| AMPHIBIA | <i>Telmatobius</i> | <i>hypselocephalus</i> | EN | Hypothesized/Future | Chytridiomycosis  |

|          |                    |                      |    |                     |                   |
|----------|--------------------|----------------------|----|---------------------|-------------------|
| AMPHIBIA | <i>Telmatobius</i> | <i>ignavus</i>       | EN | Hypothesized/Future | Chytridiomycosis  |
| AMPHIBIA | <i>Telmatobius</i> | <i>jelskii</i>       | NT | Hypothesized/Future | Chytridiomycosis  |
| AMPHIBIA | <i>Telmatobius</i> | <i>laticeps</i>      | EN | Hypothesized/Future | Chytridiomycosis  |
| AMPHIBIA | <i>Telmatobius</i> | <i>latirostris</i>   | EN | Hypothesized/Future | Chytridiomycosis  |
| AMPHIBIA | <i>Telmatobius</i> | <i>marmoratus</i>    | VU | Evidence            | Chytridiomycosis  |
| AMPHIBIA | <i>Telmatobius</i> | <i>mayoloi</i>       | EN | Hypothesized/Future | Chytridiomycosis  |
| AMPHIBIA | <i>Telmatobius</i> | <i>necopinus</i>     | EN | Hypothesized/Future | Chytridiomycosis  |
| AMPHIBIA | <i>Telmatobius</i> | <i>niger</i>         | CR | Evidence            | Multiple Diseases |
| AMPHIBIA | <i>Telmatobius</i> | <i>oxycephalus</i>   | VU | Hypothesized/Future | Chytridiomycosis  |
| AMPHIBIA | <i>Telmatobius</i> | <i>pefauri</i>       | CR | Hypothesized/Future | Chytridiomycosis  |
| AMPHIBIA | <i>Telmatobius</i> | <i>peruvianus</i>    | VU | Hypothesized/Future | Chytridiomycosis  |
| AMPHIBIA | <i>Telmatobius</i> | <i>pisanoi</i>       | EN | Hypothesized/Future | Chytridiomycosis  |
| AMPHIBIA | <i>Telmatobius</i> | <i>platycephalus</i> | EN | Hypothesized/Future | Chytridiomycosis  |
| AMPHIBIA | <i>Telmatobius</i> | <i>rimac</i>         | LC | Hypothesized/Future | Chytridiomycosis  |
| AMPHIBIA | <i>Telmatobius</i> | <i>schreiteri</i>    | EN | Hypothesized/Future | Chytridiomycosis  |
| AMPHIBIA | <i>Telmatobius</i> | <i>scrocchii</i>     | EN | Hypothesized/Future | Chytridiomycosis  |
| AMPHIBIA | <i>Telmatobius</i> | <i>sibiricus</i>     | EN | Hypothesized/Future | Chytridiomycosis  |
| AMPHIBIA | <i>Telmatobius</i> | <i>simonsi</i>       | NT | Hypothesized/Future | Chytridiomycosis  |
| AMPHIBIA | <i>Telmatobius</i> | <i>stephani</i>      | EN | Hypothesized/Future | Chytridiomycosis  |
| AMPHIBIA | <i>Telmatobius</i> | <i>thompsoni</i>     | EN | Hypothesized/Future | Chytridiomycosis  |
| AMPHIBIA | <i>Telmatobius</i> | <i>truebae</i>       | EN | Hypothesized/Future | Chytridiomycosis  |

|          |                     |                      |    |                     |                   |
|----------|---------------------|----------------------|----|---------------------|-------------------|
| AMPHIBIA | <i>Telmatobius</i>  | <i>vellardi</i>      | CR | Hypothesized/Future | Multiple Diseases |
| AMPHIBIA | <i>Telmatobius</i>  | <i>verrucosus</i>    | VU | Hypothesized/Future | Chytridiomycosis  |
| AMPHIBIA | <i>Telmatobius</i>  | <i>yuracare</i>      | VU | Hypothesized/Future | Chytridiomycosis  |
| AMPHIBIA | <i>Telmatobius</i>  | <i>zapahuirensis</i> | CR | Hypothesized/Future | Chytridiomycosis  |
| AMPHIBIA | <i>Thoropa</i>      | <i>lutzi</i>         | EN | Hypothesized/Future | Chytridiomycosis  |
| AMPHIBIA | <i>Thoropa</i>      | <i>megatypanum</i>   | LC | Hypothesized/Future | Chytridiomycosis  |
| AMPHIBIA | <i>Thoropa</i>      | <i>miliaris</i>      | LC | Hypothesized/Future | Chytridiomycosis  |
| AMPHIBIA | <i>Thoropa</i>      | <i>petropolitana</i> | VU | Hypothesized/Future | Chytridiomycosis  |
| AMPHIBIA | <i>Thoropa</i>      | <i>saxatilis</i>     | NT | Hypothesized/Future | Chytridiomycosis  |
| AMPHIBIA | <i>Triturus</i>     | <i>marmoratus</i>    | LC | Evidence            | Iridovirus        |
| AMPHIBIA | <i>Xenophrys</i>    | <i>aceras</i>        | LC | Hypothesized/Future | Unnamed Disease   |
| AVES     | <i>Acrocephalus</i> | <i>taiti</i>         | VU | Evidence            | Multiple Diseases |
| AVES     | <i>Anas</i>         | <i>acuta</i>         | LC | Hypothesized/Future | Multiple Diseases |
| AVES     | <i>Anas</i>         | <i>aucklandica</i>   | VU | Hypothesized/Future | Unnamed Disease   |
| AVES     | <i>Anas</i>         | <i>capensis</i>      | LC | Hypothesized/Future | Avian Botulism    |
| AVES     | <i>Anas</i>         | <i>clypeata</i>      | LC | Hypothesized/Future | Multiple Diseases |
| AVES     | <i>Anas</i>         | <i>crecca</i>        | LC | Hypothesized/Future | Multiple Diseases |
| AVES     | <i>Anas</i>         | <i>laysanensis</i>   | CR | Evidence            | Multiple Diseases |
| AVES     | <i>Anas</i>         | <i>nesiotis</i>      | CR | Hypothesized/Future | Multiple Diseases |
| AVES     | <i>Anas</i>         | <i>penelope</i>      | LC | Hypothesized/Future | Avian Botulism    |
| AVES     | <i>Anas</i>         | <i>platyrhynchos</i> | LC | Hypothesized/Future | Multiple Diseases |

|      |                   |                       |    |                     |                   |
|------|-------------------|-----------------------|----|---------------------|-------------------|
| AVES | <i>Anas</i>       | <i>querquedula</i>    | LC | Hypothesized/Future | Multiple Diseases |
| AVES | <i>Anas</i>       | <i>smithii</i>        | LC | Hypothesized/Future | Multiple Diseases |
| AVES | <i>Anas</i>       | <i>strepera</i>       | LC | Hypothesized/Future | Multiple Diseases |
| AVES | <i>Anas</i>       | <i>undulata</i>       | LC | Hypothesized/Future | Multiple Diseases |
| AVES | <i>Anser</i>      | <i>albifrons</i>      | LC | Hypothesized/Future | Multiple Diseases |
| AVES | <i>Anser</i>      | <i>anser</i>          | LC | Hypothesized/Future | Multiple Diseases |
| AVES | <i>Aphelocoma</i> | <i>coerulescens</i>   | VU | Hypothesized/Future | West Nile Virus   |
| AVES | <i>Aplonis</i>    | <i>cinerascens</i>    | VU | Hypothesized/Future | Multiple Diseases |
| AVES | <i>Aplonis</i>    | <i>santovestris</i>   | VU | Hypothesized/Future | Unnamed Disease   |
| AVES | <i>Ardea</i>      | <i>cinerea</i>        | LC | Hypothesized/Future | Multiple Diseases |
| AVES | <i>Arenaria</i>   | <i>interpres</i>      | LC | Hypothesized/Future | Avian Influenza   |
| AVES | <i>Aythya</i>     | <i>ferina</i>         | LC | Hypothesized/Future | Avian Influenza   |
| AVES | <i>Aythya</i>     | <i>fuligula</i>       | LC | Hypothesized/Future | Avian Influenza   |
| AVES | <i>Aythya</i>     | <i>marila</i>         | LC | Hypothesized/Future | Avian Influenza   |
| AVES | <i>Branta</i>     | <i>bernicla</i>       | LC | Hypothesized/Future | Avian Influenza   |
| AVES | <i>Branta</i>     | <i>sandvicensis</i>   | VU | Hypothesized/Future | Toxoplasmosis     |
| AVES | <i>Cacatua</i>    | <i>haematuropygia</i> | CR | Hypothesized/Future | Unnamed Disease   |
| AVES | <i>Calidris</i>   | <i>alba</i>           | LC | Hypothesized/Future | Avian Influenza   |
| AVES | <i>Calidris</i>   | <i>alpina</i>         | LC | Hypothesized/Future | Avian Influenza   |
| AVES | <i>Calidris</i>   | <i>canutus</i>        | LC | Hypothesized/Future | Avian Influenza   |
| AVES | <i>Calidris</i>   | <i>ferruginea</i>     | LC | Hypothesized/Future | Multiple Diseases |



|      |                     |                       |    |                     |                   |
|------|---------------------|-----------------------|----|---------------------|-------------------|
| AVES | <i>Calidris</i>     | <i>minuta</i>         | LC | Hypothesized/Future | Multiple Diseases |
| AVES | <i>Calidris</i>     | <i>temmiinckii</i>    | LC | Hypothesized/Future | Avian Influenza   |
| AVES | <i>Camarhynchus</i> | <i>pauper</i>         | CR | Evidence            | Multiple Diseases |
| AVES | <i>Casuaris</i>     | <i>casuaris</i>       | VU | Evidence            | Multiple Diseases |
| AVES | <i>Centrocercus</i> | <i>minimus</i>        | EN | Evidence            | West Nile Virus   |
| AVES | <i>Charadrius</i>   | <i>dubius</i>         | LC | Hypothesized/Future | Avian Botulism    |
| AVES | <i>Charadrius</i>   | <i>pecuarius</i>      | LC | Hypothesized/Future | Avian Botulism    |
| AVES | <i>Charadrius</i>   | <i>tricollaris</i>    | LC | Hypothesized/Future | Avian Botulism    |
| AVES | <i>Charmosyna</i>   | <i>diadema</i>        | CR | Hypothesized/Future | Avian Malaria     |
| AVES | <i>Charmosyna</i>   | <i>palmarum</i>       | VU | Evidence            | Avian Malaria     |
| AVES | <i>Chasiempis</i>   | <i>sandwichensis</i>  | VU | Evidence            | Avian Pox         |
| AVES | <i>Chlidonias</i>   | <i>leucopterus</i>    | LC | Hypothesized/Future | Avian Influenza   |
| AVES | <i>Chlidonias</i>   | <i>niger</i>          | LC | Hypothesized/Future | Avian Influenza   |
| AVES | <i>Clangula</i>     | <i>hyemalis</i>       | LC | Evidence            | Avian Cholera     |
| AVES | <i>Columba</i>      | <i>bollii</i>         | LC | Hypothesized/Future | Multiple Diseases |
| AVES | <i>Columba</i>      | <i>junoniae</i>       | NT | Hypothesized/Future | Multiple Diseases |
| AVES | <i>Copsychus</i>    | <i>sechellarum</i>    | EN | Evidence            | Multiple Diseases |
| AVES | <i>Coracina</i>     | <i>newtoni</i>        | CR | Evidence            | Unnamed Disease   |
| AVES | <i>Corvus</i>       | <i>hawaiiensis</i>    | EW | Evidence            | Multiple Diseases |
| AVES | <i>Corvus</i>       | <i>kubaryi</i>        | CR | Evidence            | Unnamed Disease   |
| AVES | <i>Coturnix</i>     | <i>novaezelandiae</i> | EX | Hypothesized/Future | Unnamed Disease   |

|      |                    |                       |    |                     |                   |
|------|--------------------|-----------------------|----|---------------------|-------------------|
| AVES | <i>Cygnus</i>      | <i>columbianus</i>    | LC | Hypothesized/Future | Avian Influenza   |
| AVES | <i>Cygnus</i>      | <i>cygnus</i>         | LC | Hypothesized/Future | Avian Influenza   |
| AVES | <i>Cygnus</i>      | <i>olor</i>           | LC | Hypothesized/Future | Avian Influenza   |
| AVES | <i>Dendrocygna</i> | <i>bicolor</i>        | LC | Hypothesized/Future | Avian Botulism    |
| AVES | <i>Dendrocygna</i> | <i>viduata</i>        | LC | Hypothesized/Future | Avian Botulism    |
| AVES | <i>Dicrurus</i>    | <i>aldabranus</i>     | NT | Hypothesized/Future | Unnamed Disease   |
| AVES | <i>Diomedea</i>    | <i>amsterdamensis</i> | CR | Evidence            | Multiple Diseases |
| AVES | <i>Drepanis</i>    | <i>pacifica</i>       | EX | Hypothesized/Future | Unnamed Disease   |
| AVES | <i>Ectopistes</i>  | <i>migratorius</i>    | EX | Evidence            | Newcastle Disease |
| AVES | <i>Egretta</i>     | <i>garzetta</i>       | LC | Hypothesized/Future | Avian Influenza   |
| AVES | <i>Eos</i>         | <i>histrio</i>        | EN | Hypothesized/Future | Unnamed Disease   |
| AVES | <i>Erythrura</i>   | <i>gouldiae</i>       | EN | Evidence            | Unnamed Parasite  |
| AVES | <i>Falco</i>       | <i>naumanni</i>       | VU | Evidence            | Avian Malaria     |
| AVES | <i>Fregilupus</i>  | <i>varius</i>         | EX | Hypothesized/Future | Unnamed Disease   |
| AVES | <i>Fulica</i>      | <i>alai</i>           | VU | Evidence            | Avian Botulism    |
| AVES | <i>Fulica</i>      | <i>atra</i>           | LC | Hypothesized/Future | Avian Influenza   |
| AVES | <i>Fulica</i>      | <i>cristata</i>       | LC | Hypothesized/Future | Avian Botulism    |
| AVES | <i>Gallinago</i>   | <i>gallinago</i>      | LC | Hypothesized/Future | Avian Influenza   |
| AVES | <i>Gallinago</i>   | <i>nigripennis</i>    | LC | Hypothesized/Future | Avian Botulism    |
| AVES | <i>Gallinula</i>   | <i>chloropus</i>      | LC | Hypothesized/Future | Multiple Diseases |
| AVES | <i>Gallirallus</i> | <i>sylvestris</i>     | EN | Hypothesized/Future | Unnamed Disease   |

|      |                    |                      |    |                     |                   |
|------|--------------------|----------------------|----|---------------------|-------------------|
| AVES | <i>Gavia</i>       | <i>arctica</i>       | LC | Hypothesized/Future | Avian Influenza   |
| AVES | <i>Gavia</i>       | <i>immer</i>         | LC | Hypothesized/Future | Avian Botulism    |
| AVES | <i>Gavia</i>       | <i>stellata</i>      | LC | Hypothesized/Future | Avian Influenza   |
| AVES | <i>Gerygone</i>    | <i>modesta</i>       | VU | Hypothesized/Future | Unnamed Disease   |
| AVES | <i>Grus</i>        | <i>americana</i>     | EN | Hypothesized/Future | West Nile Virus   |
| AVES | <i>Haematopus</i>  | <i>ostralegus</i>    | LC | Hypothesized/Future | Avian Influenza   |
| AVES | <i>Hemignathus</i> | <i>flavus</i>        | VU | Hypothesized/Future | Multiple Diseases |
| AVES | <i>Hemignathus</i> | <i>kauaiensis</i>    | VU | Evidence            | Multiple Diseases |
| AVES | <i>Hemignathus</i> | <i>lucidus</i>       | CR | Hypothesized/Future | Multiple Diseases |
| AVES | <i>Hemignathus</i> | <i>munroi</i>        | EN | Evidence            | Multiple Diseases |
| AVES | <i>Hemignathus</i> | <i>obscurus</i>      | EX | Hypothesized/Future | Multiple Diseases |
| AVES | <i>Hemignathus</i> | <i>parvus</i>        | VU | Evidence            | Multiple Diseases |
| AVES | <i>Heteralocha</i> | <i>acutirostris</i>  | EX | Hypothesized/Future | Unnamed Disease   |
| AVES | <i>Himantopus</i>  | <i>himantopus</i>    | LC | Hypothesized/Future | Multiple Diseases |
| AVES | <i>Larus</i>       | <i>argentatus</i>    | LC | Hypothesized/Future | Avian Influenza   |
| AVES | <i>Larus</i>       | <i>cirrocephalus</i> | LC | Hypothesized/Future | Avian Botulism    |
| AVES | <i>Larus</i>       | <i>dominicanus</i>   | LC | Hypothesized/Future | Multiple Diseases |
| AVES | <i>Larus</i>       | <i>fuscus</i>        | LC | Hypothesized/Future | Avian Botulism    |
| AVES | <i>Larus</i>       | <i>genei</i>         | LC | Hypothesized/Future | Avian Influenza   |
| AVES | <i>Larus</i>       | <i>hartlaubii</i>    | LC | Hypothesized/Future | Avian Botulism    |
| AVES | <i>Larus</i>       | <i>ichthyaetus</i>   | LC | Hypothesized/Future | Avian Botulism    |

|      |                     |                        |    |                     |                   |
|------|---------------------|------------------------|----|---------------------|-------------------|
| AVES | <i>Larus</i>        | <i>leucophthalmus</i>  | NT | Evidence            | West Nile Virus   |
| AVES | <i>Larus</i>        | <i>ridibundus</i>      | LC | Hypothesized/Future | Multiple Diseases |
| AVES | <i>Leptoptilos</i>  | <i>dubius</i>          | EN | Hypothesized/Future | Unnamed Disease   |
| AVES | <i>Leucopsar</i>    | <i>rothschildi</i>     | CR | Hypothesized/Future | Unnamed Disease   |
| AVES | <i>Limosa</i>       | <i>lapponica</i>       | LC | Hypothesized/Future | Avian Influenza   |
| AVES | <i>Loriculus</i>    | <i>catamene</i>        | NT | Hypothesized/Future | Unnamed Disease   |
| AVES | <i>Loxioides</i>    | <i>bailleui</i>        | CR | Hypothesized/Future | Unnamed Disease   |
| AVES | <i>Loxops</i>       | <i>caeruleirostris</i> | CR | Hypothesized/Future | Multiple Diseases |
| AVES | <i>Loxops</i>       | <i>coccineus</i>       | EN | Evidence            | Multiple Diseases |
| AVES | <i>Megadyptes</i>   | <i>antipodes</i>       | EN | Evidence            | Avian Malaria     |
| AVES | <i>Melamprosops</i> | <i>phaeosoma</i>       | CR | Hypothesized/Future | Unnamed Disease   |
| AVES | <i>Melanitta</i>    | <i>fusca</i>           | LC | Hypothesized/Future | Avian Influenza   |
| AVES | <i>Melanitta</i>    | <i>nigra</i>           | LC | Hypothesized/Future | Avian Influenza   |
| AVES | <i>Meleagris</i>    | <i>ocellata</i>        | NT | Hypothesized/Future | Multiple Diseases |
| AVES | <i>Mergellus</i>    | <i>albellus</i>        | LC | Hypothesized/Future | Avian Influenza   |
| AVES | <i>Mergus</i>       | <i>merganser</i>       | LC | Hypothesized/Future | Avian Influenza   |
| AVES | <i>Mergus</i>       | <i>serrator</i>        | LC | Hypothesized/Future | Avian Influenza   |
| AVES | <i>Mimus</i>        | <i>melanotis</i>       | EN | Evidence            | Multiple Diseases |
| AVES | <i>Mimus</i>        | <i>trifasciatus</i>    | CR | Hypothesized/Future | Multiple Diseases |
| AVES | <i>Moho</i>         | <i>apicalis</i>        | EX | Hypothesized/Future | Multiple Diseases |
| AVES | <i>Moho</i>         | <i>bishopi</i>         | EX | Evidence            | Multiple Diseases |

|      |                    |                        |    |                     |                   |
|------|--------------------|------------------------|----|---------------------|-------------------|
| AVES | <i>Moho</i>        | <i>braccatus</i>       | EX | Hypothesized/Future | Multiple Diseases |
| AVES | <i>Moho</i>        | <i>nobilis</i>         | EX | Hypothesized/Future | Unnamed Disease   |
| AVES | <i>Myadestes</i>   | <i>lanaiensis</i>      | CR | Hypothesized/Future | Multiple Diseases |
| AVES | <i>Myadestes</i>   | <i>myadestinus</i>     | EX | Evidence            | Multiple Diseases |
| AVES | <i>Myadestes</i>   | <i>obscurus</i>        | VU | Hypothesized/Future | Multiple Diseases |
| AVES | <i>Myadestes</i>   | <i>palmeri</i>         | CR | Evidence            | Multiple Diseases |
| AVES | <i>Neophema</i>    | <i>chrysogaster</i>    | CR | Hypothesized/Future | Multiple Diseases |
| AVES | <i>Nesoenas</i>    | <i>mayeri</i>          | EN | Evidence            | Trichomoniasis    |
| AVES | <i>Netta</i>       | <i>erythrophthalma</i> | LC | Hypothesized/Future | Avian Botulism    |
| AVES | <i>Netta</i>       | <i>rufina</i>          | LC | Hypothesized/Future | Avian Influenza   |
| AVES | <i>Ninox</i>       | <i>natalis</i>         | VU | Hypothesized/Future | Unnamed Disease   |
| AVES | <i>Notiomystis</i> | <i>cincta</i>          | VU | Evidence            | Unnamed Disease   |
| AVES | <i>Numenius</i>    | <i>arquata</i>         | NT | Hypothesized/Future | Avian Influenza   |
| AVES | <i>Numenius</i>    | <i>phaeopus</i>        | LC | Hypothesized/Future | Avian Influenza   |
| AVES | <i>Nycticorax</i>  | <i>nycticorax</i>      | LC | Hypothesized/Future | Avian Influenza   |
| AVES | <i>Oreomystis</i>  | <i>bairdi</i>          | CR | Evidence            | Multiple Diseases |
| AVES | <i>Oreomystis</i>  | <i>mana</i>            | EN | Evidence            | Multiple Diseases |
| AVES | <i>Palmeria</i>    | <i>dolei</i>           | CR | Evidence            | Multiple Diseases |
| AVES | <i>Paroreomyza</i> | <i>flammea</i>         | EX | Hypothesized/Future | Unnamed Disease   |
| AVES | <i>Paroreomyza</i> | <i>maculata</i>        | CR | Evidence            | Multiple Diseases |
| AVES | <i>Pelecanus</i>   | <i>philippensis</i>    | NT | Hypothesized/Future | Avian Influenza   |

|      |                       |                     |    |                     |                                  |
|------|-----------------------|---------------------|----|---------------------|----------------------------------|
| AVES | <i>Phalacrocorax</i>  | <i>aristotelis</i>  | LC | Hypothesized/Future | Multiple Diseases                |
| AVES | <i>Phalacrocorax</i>  | <i>capensis</i>     | NT | Evidence            | Avian Cholera                    |
| AVES | <i>Phalacrocorax</i>  | <i>carbo</i>        | LC | Hypothesized/Future | Multiple Diseases                |
| AVES | <i>Phalacrocorax</i>  | <i>nigrogularis</i> | VU | Hypothesized/Future | Unnamed Parasite                 |
| AVES | <i>Philomachus</i>    | <i>pugnax</i>       | LC | Hypothesized/Future | Multiple Diseases                |
| AVES | <i>Phoebastria</i>    | <i>immutabilis</i>  | NT | Evidence            | Avian Pox                        |
| AVES | <i>Phoebetria</i>     | <i>fusca</i>        | EN | Hypothesized/Future | Multiple Diseases                |
| AVES | <i>Phoenicopterus</i> | <i>roseus</i>       | LC | Evidence            | Multiple Diseases                |
| AVES | <i>Platalea</i>       | <i>leucorodia</i>   | LC | Hypothesized/Future | Avian Influenza                  |
| AVES | <i>Platalea</i>       | <i>minor</i>        | EN | Evidence            | Multiple Diseases                |
| AVES | <i>Plegadis</i>       | <i>falcinellus</i>  | LC | Hypothesized/Future | Avian Influenza                  |
| AVES | <i>Podiceps</i>       | <i>cristatus</i>    | LC | Hypothesized/Future | Avian Influenza                  |
| AVES | <i>Podiceps</i>       | <i>nigricollis</i>  | LC | Hypothesized/Future | Multiple Diseases                |
| AVES | <i>Pomarea</i>        | <i>dimidiata</i>    | EN | Hypothesized/Future | Multiple Diseases                |
| AVES | <i>Pomarea</i>        | <i>fluxa</i>        | EX | Hypothesized/Future | Multiple Diseases                |
| AVES | <i>Porphyrio</i>      | <i>porphyrio</i>    | LC | Hypothesized/Future | Multiple Diseases                |
| AVES | <i>Porzana</i>        | <i>atra</i>         | VU | Hypothesized/Future | Multiple Diseases                |
| AVES | <i>Prioniturus</i>    | <i>platenae</i>     | VU | Hypothesized/Future | Unnamed Disease                  |
| AVES | <i>Progne</i>         | <i>modesta</i>      | VU | Hypothesized/Future | <i>Philornis downsi</i> Parasite |
| AVES | <i>Psephotus</i>      | <i>pulcherrimus</i> | EX | Hypothesized/Future | Unnamed Disease                  |
| AVES | <i>Psittirostra</i>   | <i>psittacea</i>    | CR | Evidence            | Multiple Diseases                |

|      |                      |                      |    |                     |                   |
|------|----------------------|----------------------|----|---------------------|-------------------|
| AVES | <i>Ptilinopus</i>    | <i>insularis</i>     | VU | Hypothesized/Future | Multiple Diseases |
| AVES | <i>Ptilinopus</i>    | <i>rarotongensis</i> | VU | Hypothesized/Future | Multiple Diseases |
| AVES | <i>Recurvirostra</i> | <i>avosetta</i>      | LC | Hypothesized/Future | Multiple Diseases |
| AVES | <i>Rhipidura</i>     | <i>malaitae</i>      | VU | Hypothesized/Future | Unnamed Disease   |
| AVES | <i>Rhipidura</i>     | <i>semirubra</i>     | VU | Hypothesized/Future | Unnamed Disease   |
| AVES | <i>Rissa</i>         | <i>tridactyla</i>    | LC | Hypothesized/Future | Avian Influenza   |
| AVES | <i>Sarcogyps</i>     | <i>calvus</i>        | CR | Evidence            | Unnamed Disease   |
| AVES | <i>Sarkidiornis</i>  | <i>melanotos</i>     | LC | Hypothesized/Future | Avian Influenza   |
| AVES | <i>Scolopax</i>      | <i>rusticola</i>     | LC | Hypothesized/Future | Avian Influenza   |
| AVES | <i>Spheniscus</i>    | <i>mendiculus</i>    | EN | Hypothesized/Future | Unnamed Disease   |
| AVES | <i>Sterna</i>        | <i>albifrons</i>     | LC | Hypothesized/Future | Avian Influenza   |
| AVES | <i>Sterna</i>        | <i>caspia</i>        | LC | Hypothesized/Future | Multiple Diseases |
| AVES | <i>Sterna</i>        | <i>dougallii</i>     | LC | Evidence            | Unnamed Disease   |
| AVES | <i>Sterna</i>        | <i>hirundo</i>       | LC | Hypothesized/Future | Avian Influenza   |
| AVES | <i>Strigops</i>      | <i>habroptila</i>    | CR | Evidence            | Unnamed Disease   |
| AVES | <i>Tachybaptus</i>   | <i>ruficollis</i>    | LC | Hypothesized/Future | Multiple Diseases |
| AVES | <i>Tadorna</i>       | <i>cana</i>          | LC | Hypothesized/Future | Avian Botulism    |
| AVES | <i>Tadorna</i>       | <i>ferruginea</i>    | LC | Hypothesized/Future | Avian Influenza   |
| AVES | <i>Tadorna</i>       | <i>tadorna</i>       | LC | Hypothesized/Future | Avian Influenza   |
| AVES | <i>Telespiza</i>     | <i>cantans</i>       | VU | Hypothesized/Future | Unnamed Disease   |
| AVES | <i>Telespiza</i>     | <i>ultima</i>        | CR | Hypothesized/Future | Unnamed Disease   |

|          |                      |                        |    |                     |                   |
|----------|----------------------|------------------------|----|---------------------|-------------------|
| AVES     | <i>Thalassarche</i>  | <i>carteri</i>         | EN | Evidence            | Multiple Diseases |
| AVES     | <i>Thalassarche</i>  | <i>cauta</i>           | NT | Evidence            | Avian Pox         |
| AVES     | <i>Thinornis</i>     | <i>novaeseelandiae</i> | EN | Hypothesized/Future | Unnamed Disease   |
| AVES     | <i>Threskiornis</i>  | <i>aethiopicus</i>     | LC | Hypothesized/Future | Avian Botulism    |
| AVES     | <i>Tringa</i>        | <i>glareola</i>        | LC | Hypothesized/Future | Multiple Diseases |
| AVES     | <i>Tringa</i>        | <i>ochropus</i>        | LC | Hypothesized/Future | Avian Influenza   |
| AVES     | <i>Tringa</i>        | <i>stagnatilis</i>     | LC | Hypothesized/Future | Avian Botulism    |
| AVES     | <i>Tringa</i>        | <i>totanus</i>         | LC | Hypothesized/Future | Avian Influenza   |
| AVES     | <i>Vanellus</i>      | <i>armatus</i>         | LC | Hypothesized/Future | Avian Botulism    |
| AVES     | <i>Vanellus</i>      | <i>vanellus</i>        | LC | Hypothesized/Future | Avian Botulism    |
| AVES     | <i>Vestiaria</i>     | <i>coccinea</i>        | VU | Hypothesized/Future | Avian Malaria     |
| AVES     | <i>Vini</i>          | <i>stepheni</i>        | VU | Hypothesized/Future | Multiple Diseases |
| MAMMALIA | <i>Acinonyx</i>      | <i>jubatus</i>         | VU | Evidence            | Anthrax           |
| MAMMALIA | <i>Alcelaphus</i>    | <i>buselaphus</i>      | LC | Evidence            | Multiple Diseases |
| MAMMALIA | <i>Alces</i>         | <i>alces</i>           | LC | Evidence            | Wasting Disease   |
| MAMMALIA | <i>Alces</i>         | <i>americanus</i>      | LC | Evidence            | Unnamed Disease   |
| MAMMALIA | <i>Alopex</i>        | <i>lagopus</i>         | LC | Evidence            | Multiple Diseases |
| MAMMALIA | <i>Alouatta</i>      | <i>pigra</i>           | EN | Evidence            | Yellow Fever      |
| MAMMALIA | <i>Anisomys</i>      | <i>imitator</i>        | LC | Hypothesized/Future | Unnamed Parasite  |
| MAMMALIA | <i>Arabitragus</i>   | <i>jayakari</i>        | EN | Hypothesized/Future | Multiple Diseases |
| MAMMALIA | <i>Arctocephalus</i> | <i>australis</i>       | LC | Hypothesized/Future | Unnamed Disease   |



|          |                      |                      |    |                     |                   |
|----------|----------------------|----------------------|----|---------------------|-------------------|
| MAMMALIA | <i>Arctocephalus</i> | <i>forsteri</i>      | LC | Hypothesized/Future | Multiple Diseases |
| MAMMALIA | <i>Arctocephalus</i> | <i>galapagoensis</i> | EN | Evidence            | Morbillivirus     |
| MAMMALIA | <i>Arctocephalus</i> | <i>gazella</i>       | LC | Hypothesized/Future | Unnamed Disease   |
| MAMMALIA | <i>Arctocephalus</i> | <i>philippii</i>     | NT | Hypothesized/Future | Unnamed Disease   |
| MAMMALIA | <i>Arctocephalus</i> | <i>pusillus</i>      | LC | Hypothesized/Future | Unnamed Disease   |
| MAMMALIA | <i>Arctocephalus</i> | <i>townsendi</i>     | NT | Hypothesized/Future | Unnamed Disease   |
| MAMMALIA | <i>Arctocephalus</i> | <i>tropicalis</i>    | LC | Evidence            | Unnamed Disease   |
| MAMMALIA | <i>Arvicola</i>      | <i>sapidus</i>       | VU | Hypothesized/Future | Multiple Diseases |
| MAMMALIA | <i>Atelocynus</i>    | <i>microtis</i>      | NT | Evidence            | Unnamed Disease   |
| MAMMALIA | <i>Axis</i>          | <i>axis</i>          | LC | Evidence            | Multiple Diseases |
| MAMMALIA | <i>Axis</i>          | <i>porcinus</i>      | EN | Hypothesized/Future | Unnamed Disease   |
| MAMMALIA | <i>Balaenoptera</i>  | <i>borealis</i>      | EN | Hypothesized/Future | Baleen Disease    |
| MAMMALIA | <i>Beatragus</i>     | <i>hunteri</i>       | CR | Evidence            | Unnamed Disease   |
| MAMMALIA | <i>Bettongia</i>     | <i>lesueur</i>       | NT | Evidence            | Multiple Diseases |
| MAMMALIA | <i>Bettongia</i>     | <i>penicillata</i>   | CR | Hypothesized/Future | Unnamed Disease   |
| MAMMALIA | <i>Bison</i>         | <i>bonasus</i>       | VU | Evidence            | Multiple Diseases |
| MAMMALIA | <i>Blastocerus</i>   | <i>dichotomus</i>    | VU | Evidence            | Multiple Diseases |
| MAMMALIA | <i>Bos</i>           | <i>gaurus</i>        | VU | Evidence            | Multiple Diseases |
| MAMMALIA | <i>Bos</i>           | <i>javanicus</i>     | EN | Evidence            | Unnamed Disease   |
| MAMMALIA | <i>Bos</i>           | <i>mutus</i>         | VU | Hypothesized/Future | Multiple Diseases |
| MAMMALIA | <i>Bos</i>           | <i>primigenius</i>   | EX | Evidence            | Multiple Diseases |

|          |                        |                      |    |                     |                   |
|----------|------------------------|----------------------|----|---------------------|-------------------|
| MAMMALIA | <i>Bos</i>             | <i>sauveli</i>       | CR | Hypothesized/Future | Multiple Diseases |
| MAMMALIA | <i>Brachylagus</i>     | <i>idahoensis</i>    | LC | Evidence            | Unnamed Disease   |
| MAMMALIA | <i>Brachytarsomys</i>  | <i>albicauda</i>     | LC | Evidence            | Plague            |
| MAMMALIA | <i>Brachytarsomys</i>  | <i>villosa</i>       | EN | Evidence            | Plague            |
| MAMMALIA | <i>Brachyuromys</i>    | <i>betsileoensis</i> | LC | Evidence            | Plague            |
| MAMMALIA | <i>Brachyuromys</i>    | <i>ramirohitra</i>   | LC | Evidence            | Plague            |
| MAMMALIA | <i>Bubalus</i>         | <i>arnee</i>         | EN | Evidence            | Unnamed Disease   |
| MAMMALIA | <i>Budorcas</i>        | <i>taxicolor</i>     | VU | Evidence            | Multiple Diseases |
| MAMMALIA | <i>Canis</i>           | <i>simensis</i>      | EN | Evidence            | Unnamed Disease   |
| MAMMALIA | <i>Capra</i>           | <i>ibex</i>          | LC | Hypothesized/Future | Unnamed Disease   |
| MAMMALIA | <i>Capra</i>           | <i>pyrenaica</i>     | LC | Evidence            | Mange             |
| MAMMALIA | <i>Capricornis</i>     | <i>swinhoei</i>      | LC | Evidence            | Unnamed Parasites |
| MAMMALIA | <i>Castor</i>          | <i>canadensis</i>    | LC | Evidence            | Tularemia         |
| MAMMALIA | <i>Catagonus</i>       | <i>wagneri</i>       | EN | Evidence            | Unnamed Disease   |
| MAMMALIA | <i>Cephalorhynchus</i> | <i>hectori</i>       | EN | Evidence            | Unnamed Disease   |
| MAMMALIA | <i>Cerdocyon</i>       | <i>thous</i>         | LC | Evidence            | Multiple Diseases |
| MAMMALIA | <i>Chaeropus</i>       | <i>ecaudatus</i>     | EX | Hypothesized/Future | Unnamed Disease   |
| MAMMALIA | <i>Chrysocyon</i>      | <i>brachyurus</i>    | NT | Evidence            | Unnamed Disease   |
| MAMMALIA | <i>Connochaetes</i>    | <i>gnou</i>          | LC | Evidence            | Unnamed Disease   |
| MAMMALIA | <i>Crocidura</i>       | <i>trichura</i>      | CR | Hypothesized/Future | Unnamed Disease   |
| MAMMALIA | <i>Cuon</i>            | <i>alpinus</i>       | EN | Evidence            | Multiple Diseases |

|          |                   |                     |    |                     |                         |
|----------|-------------------|---------------------|----|---------------------|-------------------------|
| MAMMALIA | <i>Cynomys</i>    | <i>gunnisoni</i>    | LC | Evidence            | Plague                  |
| MAMMALIA | <i>Cynomys</i>    | <i>leucurus</i>     | LC | Evidence            | Plague                  |
| MAMMALIA | <i>Cynomys</i>    | <i>ludovicianus</i> | LC | Evidence            | Plague                  |
| MAMMALIA | <i>Cynomys</i>    | <i>parvidens</i>    | EN | Evidence            | Plague                  |
| MAMMALIA | <i>Cystophora</i> | <i>cristata</i>     | VU | Evidence            | Morbillivirus           |
| MAMMALIA | <i>Dasyprocta</i> | <i>coibae</i>       | VU | Hypothesized/Future | Unnamed Disease         |
| MAMMALIA | <i>Dasyurus</i>   | <i>hallucatus</i>   | EN | Hypothesized/Future | Unnamed Disease         |
| MAMMALIA | <i>Delphinus</i>  | <i>delphis</i>      | LC | Evidence            | Morbillivirus           |
| MAMMALIA | <i>Eliurus</i>    | <i>grandidieri</i>  | LC | Evidence            | Plague                  |
| MAMMALIA | <i>Eliurus</i>    | <i>majori</i>       | LC | Evidence            | Plague                  |
| MAMMALIA | <i>Eliurus</i>    | <i>minor</i>        | LC | Evidence            | Plague                  |
| MAMMALIA | <i>Eliurus</i>    | <i>penicillatus</i> | EN | Evidence            | Plague                  |
| MAMMALIA | <i>Eliurus</i>    | <i>petteri</i>      | VU | Evidence            | Plague                  |
| MAMMALIA | <i>Eliurus</i>    | <i>tanala</i>       | LC | Evidence            | Plague                  |
| MAMMALIA | <i>Enhydra</i>    | <i>lutris</i>       | EN | Evidence            | Multiple Diseases       |
| MAMMALIA | <i>Equus</i>      | <i>ferus</i>        | CR | Evidence            | Multiple Diseases       |
| MAMMALIA | <i>Equus</i>      | <i>grevyi</i>       | EN | Evidence            | Anthrax                 |
| MAMMALIA | <i>Equus</i>      | <i>hemionus</i>     | EN | Evidence            | African Horse Sickness  |
| MAMMALIA | <i>Equus</i>      | <i>kiang</i>        | LC | Hypothesized/Future | Multiple Diseases       |
| MAMMALIA | <i>Erignathus</i> | <i>barbatus</i>     | LC | Hypothesized/Future | Phocine Distemper Virus |
| MAMMALIA | <i>Eubalaena</i>  | <i>glacialis</i>    | EN | Hypothesized/Future | Unnamed Disease         |

|          |                     |                   |    |                     |                                        |
|----------|---------------------|-------------------|----|---------------------|----------------------------------------|
| MAMMALIA | <i>Eumetopias</i>   | <i>jubatus</i>    | EN | Hypothesized/Future | Unnamed Disease                        |
| MAMMALIA | <i>Felis</i>        | <i>margarita</i>  | NT | Evidence            | Multiple Diseases                      |
| MAMMALIA | <i>Felis</i>        | <i>silvestris</i> | LC | Hypothesized/Future | Multiple Diseases                      |
| MAMMALIA | <i>Genetta</i>      | <i>genetta</i>    | LC | Hypothesized/Future | Multiple Diseases                      |
| MAMMALIA | <i>Glaucomys</i>    | <i>sabrinus</i>   | LC | Evidence            | Unnamed Parasite                       |
| MAMMALIA | <i>Gorilla</i>      | <i>beringei</i>   | EN | Evidence            | Multiple Diseases                      |
| MAMMALIA | <i>Gorilla</i>      | <i>gorilla</i>    | CR | Evidence            | Ebola                                  |
| MAMMALIA | <i>Gymnuromys</i>   | <i>roberti</i>    | LC | Evidence            | Plague                                 |
| MAMMALIA | <i>Hippocamelus</i> | <i>bisulcus</i>   | EN | Evidence            | Unnamed Disease                        |
| MAMMALIA | <i>Homo</i>         | <i>sapiens</i>    | LC | Evidence            | Multiple Diseases                      |
| MAMMALIA | <i>Hypogeomys</i>   | <i>antimena</i>   | EN | Hypothesized/Future | Toxoplasmosis                          |
| MAMMALIA | <i>Kobus</i>        | <i>kob</i>        | LC | Evidence            | Rinderpest                             |
| MAMMALIA | <i>Lagostrophus</i> | <i>fasciatus</i>  | EN | Evidence            | Unnamed Disease                        |
| MAMMALIA | <i>Lasiorhinus</i>  | <i>latifrons</i>  | LC | Evidence            | Mange                                  |
| MAMMALIA | <i>Leopardus</i>    | <i>geoffroyi</i>  | LC | Hypothesized/Future | Multiple Diseases                      |
| MAMMALIA | <i>Leopardus</i>    | <i>wiedii</i>     | NT | Evidence            | Unnamed Disease                        |
| MAMMALIA | <i>Lepus</i>        | <i>capensis</i>   | LC | Hypothesized/Future | Unnamed Disease<br>European Brown Hare |
| MAMMALIA | <i>Lepus</i>        | <i>corsicanus</i> | VU | Evidence            | Syndrome                               |
| MAMMALIA | <i>Lepus</i>        | <i>europaeus</i>  | LC | Evidence            | Multiple Diseases                      |
| MAMMALIA | <i>Lepus</i>        | <i>timidus</i>    | LC | Evidence            | Multiple Diseases                      |
| MAMMALIA | <i>Lepus</i>        | <i>townsendii</i> | LC | Hypothesized/Future | Unnamed Disease                        |

|          |                    |                      |    |                     |                         |
|----------|--------------------|----------------------|----|---------------------|-------------------------|
| MAMMALIA | <i>Lontra</i>      | <i>canadensis</i>    | LC | Evidence            | Multiple Diseases       |
| MAMMALIA | <i>Lycaon</i>      | <i>pictus</i>        | EN | Evidence            | Unnamed Disease         |
| MAMMALIA | <i>Marmota</i>     | <i>sibirica</i>      | EN | Evidence            | Plague                  |
| MAMMALIA | <i>Martes</i>      | <i>foina</i>         | LC | Hypothesized/Future | Rabies                  |
| MAMMALIA | <i>Meles</i>       | <i>meles</i>         | LC | Evidence            | Rabies                  |
| MAMMALIA | <i>Melomys</i>     | <i>fraterculus</i>   | CR | Hypothesized/Future | Unnamed Disease         |
| MAMMALIA | <i>Melomys</i>     | <i>rubicola</i>      | CR | Hypothesized/Future | Unnamed Disease         |
| MAMMALIA | <i>Mephitis</i>    | <i>mephitis</i>      | LC | Evidence            | Rabies                  |
| MAMMALIA | <i>Monachus</i>    | <i>monachus</i>      | CR | Evidence            | Multiple Diseases       |
| MAMMALIA | <i>Monachus</i>    | <i>schauinslandi</i> | CR | Hypothesized/Future | Multiple Diseases       |
| MAMMALIA | <i>Mustela</i>     | <i>erminea</i>       | LC | Evidence            | Unnamed Disease         |
| MAMMALIA | <i>Mustela</i>     | <i>lutreola</i>      | EN | Hypothesized/Future | Aleutian Disease        |
| MAMMALIA | <i>Mustela</i>     | <i>nigripes</i>      | EN | Evidence            | Multiple Diseases       |
| MAMMALIA | <i>Nasua</i>       | <i>narica</i>        | LC | Evidence            | Multiple Diseases       |
| MAMMALIA | <i>Neophocaena</i> | <i>phocaenoides</i>  | VU | Hypothesized/Future | Multiple Diseases       |
| MAMMALIA | <i>Neotoma</i>     | <i>magister</i>      | NT | Evidence            | Unnamed Parasite        |
| MAMMALIA | <i>Nesomys</i>     | <i>rufus</i>         | LC | Evidence            | Plague                  |
| MAMMALIA | <i>Nyctereutes</i> | <i>procyonoides</i>  | LC | Evidence            | Multiple Diseases       |
| MAMMALIA | <i>Odocoileus</i>  | <i>hemionus</i>      | LC | Evidence            | Chronic Wasting Disease |
| MAMMALIA | <i>Oryctolagus</i> | <i>cuniculus</i>     | NT | Evidence            | Hemmoragic Fever        |
| MAMMALIA | <i>Ovis</i>        | <i>ammon</i>         | NT | Hypothesized/Future | Multiple Diseases       |

|          |                        |                      |    |                     |                         |
|----------|------------------------|----------------------|----|---------------------|-------------------------|
| MAMMALIA | <i>Ovis</i>            | <i>canadensis</i>    | LC | Evidence            | Multiple Diseases       |
| MAMMALIA | <i>Ovis</i>            | <i>orientalis</i>    | VU | Hypothesized/Future | Unnamed Disease         |
| MAMMALIA | <i>Ozotoceros</i>      | <i>bezoarticus</i>   | NT | Hypothesized/Future | Bovine Disease          |
| MAMMALIA | <i>Pagophilus</i>      | <i>groenlandicus</i> | LC | Hypothesized/Future | Phocine Distemper Virus |
| MAMMALIA | <i>Pan</i>             | <i>paniscus</i>      | EN | Evidence            | Multiple Diseases       |
| MAMMALIA | <i>Pan</i>             | <i>troglodytes</i>   | EN | Evidence            | Multiple Diseases       |
| MAMMALIA | <i>Panthera</i>        | <i>leo</i>           | VU | Evidence            | Unnamed Disease         |
| MAMMALIA | <i>Papio</i>           | <i>anubis</i>        | LC | Hypothesized/Future | Unnamed Disease         |
| MAMMALIA | <i>Perameles</i>       | <i>bougainville</i>  | EN | Evidence            | Unnamed Disease         |
| MAMMALIA | <i>Phalanger</i>       | <i>lullulae</i>      | EN | Hypothesized/Future | Unnamed Disease         |
| MAMMALIA | <i>Phascolarctos</i>   | <i>cinereus</i>      | LC | Evidence            | Unnamed Disease         |
| MAMMALIA | <i>Phoca</i>           | <i>vitulina</i>      | LC | Evidence            | Morbillivirus           |
| MAMMALIA | <i>Phocarctos</i>      | <i>hookeri</i>       | VU | Evidence            | Multiple Diseases       |
| MAMMALIA | <i>Phocoena</i>        | <i>phocoena</i>      | LC | Evidence            | Pulmonary Nematodosis   |
| MAMMALIA | <i>Pongo</i>           | <i>pygmaeus</i>      | EN | Hypothesized/Future | Unnamed Disease         |
| MAMMALIA | <i>Potorous</i>        | <i>platyops</i>      | EX | Hypothesized/Future | Unnamed Disease         |
| MAMMALIA | <i>Procapra</i>        | <i>gutturosa</i>     | LC | Hypothesized/Future | Unnamed Disease         |
| MAMMALIA | <i>Procyon</i>         | <i>pygmaeus</i>      | CR | Hypothesized/Future | Multiple Diseases       |
| MAMMALIA | <i>Pseudalopex</i>     | <i>fulvipes</i>      | CR | Hypothesized/Future | Unnamed Disease         |
| MAMMALIA | <i>Pseudantechinus</i> | <i>mimulus</i>       | EN | Hypothesized/Future | Unnamed Disease         |
| MAMMALIA | <i>Pseudois</i>        | <i>nayaur</i>        | LC | Evidence            | Mange                   |

|          |                      |                      |    |                     |                             |
|----------|----------------------|----------------------|----|---------------------|-----------------------------|
| MAMMALIA | <i>Pteronura</i>     | <i>brasiliensis</i>  | EN | Evidence            | Multiple Diseases           |
| MAMMALIA | <i>Pteropus</i>      | <i>melanotus</i>     | VU | Hypothesized/Future | Unnamed Disease             |
| MAMMALIA | <i>Pteropus</i>      | <i>neohibernicus</i> | LC | Evidence            | Morbillivirus               |
| MAMMALIA | <i>Pteropus</i>      | <i>poliocephalus</i> | VU | Hypothesized/Future | Unnamed Disease             |
| MAMMALIA | <i>Pteropus</i>      | <i>rayneri</i>       | NT | Hypothesized/Future | Unnamed Disease             |
| MAMMALIA | <i>Pteropus</i>      | <i>ualanus</i>       | VU | Evidence            | Unnamed Disease             |
| MAMMALIA | <i>Pusa</i>          | <i>casgica</i>       | EN | Evidence            | Multiple Diseases           |
| MAMMALIA | <i>Pusa</i>          | <i>sibirica</i>      | LC | Evidence            | Phocine Distemper Virus     |
| MAMMALIA | <i>Rangifer</i>      | <i>tarandus</i>      | LC | Evidence            | Unnamed Parasite            |
| MAMMALIA | <i>Rattus</i>        | <i>macleari</i>      | EX | Evidence            | Unnamed Disease             |
| MAMMALIA | <i>Rattus</i>        | <i>nativitatis</i>   | EX | Evidence            | Unnamed Disease             |
| MAMMALIA | <i>Rhinoceros</i>    | <i>sondaicus</i>     | CR | Hypothesized/Future | Unnamed Disease             |
| MAMMALIA | <i>Rhinopithecus</i> | <i>brelichi</i>      | EN | Hypothesized/Future | Unnamed Disease             |
| MAMMALIA | <i>Rupicapra</i>     | <i>pyrenaica</i>     | LC | Evidence            | Multiple Diseases           |
| MAMMALIA | <i>Rupicapra</i>     | <i>rupicapra</i>     | LC | Evidence            | Multiple Diseases           |
| MAMMALIA | <i>Rusa</i>          | <i>marianna</i>      | VU | Hypothesized/Future | Unnamed Disease             |
| MAMMALIA | <i>Sarcophilus</i>   | <i>harrisii</i>      | EN | Evidence            | Devil Facial Tumour Disease |
| MAMMALIA | <i>Sciurus</i>       | <i>vulgaris</i>      | LC | Evidence            | Parapox Virus               |
| MAMMALIA | <i>Sorex</i>         | <i>pribilofensis</i> | EN | Hypothesized/Future | Unnamed Disease             |
| MAMMALIA | <i>Speothos</i>      | <i>venaticus</i>     | NT | Evidence            | Multiple Diseases           |
| MAMMALIA | <i>Spermophilus</i>  | <i>elegans</i>       | LC | Evidence            | Plague                      |

|          |                     |                      |    |                     |                   |
|----------|---------------------|----------------------|----|---------------------|-------------------|
| MAMMALIA | <i>Spermophilus</i> | <i>washingtoni</i>   | NT | Hypothesized/Future | Plague            |
| MAMMALIA | <i>Sus</i>          | <i>scrofa</i>        | LC | Evidence            | Multiple Diseases |
| MAMMALIA | <i>Syncerus</i>     | <i>caffer</i>        | LC | Evidence            | Multiple Diseases |
| MAMMALIA | <i>Tapirus</i>      | <i>bairdii</i>       | EN | Evidence            | Unnamed Disease   |
| MAMMALIA | <i>Tapirus</i>      | <i>pinchaque</i>     | EN | Hypothesized/Future | Unnamed Disease   |
| MAMMALIA | <i>Thylacinus</i>   | <i>cynocephalus</i>  | EX | Hypothesized/Future | Unnamed Disease   |
| MAMMALIA | <i>Tragelaphus</i>  | <i>angasii</i>       | LC | Evidence            | Rinderpest        |
| MAMMALIA | <i>Tragelaphus</i>  | <i>derbianus</i>     | LC | Evidence            | Rinderpest        |
| MAMMALIA | <i>Tragelaphus</i>  | <i>eurycerus</i>     | NT | Evidence            | Rinderpest        |
| MAMMALIA | <i>Tragelaphus</i>  | <i>imberbis</i>      | NT | Evidence            | Rinderpest        |
| MAMMALIA | <i>Trichechus</i>   | <i>manatus</i>       | VU | Evidence            | Multiple Diseases |
| MAMMALIA | <i>Urocyon</i>      | <i>littoralis</i>    | CR | Hypothesized/Future | Multiple Diseases |
| MAMMALIA | <i>Vombatus</i>     | <i>ursinus</i>       | LC | Evidence            | Mange             |
| MAMMALIA | <i>Vulpes</i>       | <i>bengalensis</i>   | LC | Hypothesized/Future | Unnamed Disease   |
| MAMMALIA | <i>Zaedyus</i>      | <i>pichiy</i>        | NT | Evidence            | Unnamed Disease   |
| MAMMALIA | <i>Zalophus</i>     | <i>californianus</i> | LC | Evidence            | Unnamed Disease   |
| MAMMALIA | <i>Zalophus</i>     | <i>wollebaeki</i>    | EN | Evidence            | Unnamed Disease   |

610

611

612
